# Supplementary material for: Genome-Wide Analysis of the “Cut-and-Paste” Transposons of Grapevine
Source: PLoS One. 2008 Sep 3;3(9):e3107. doi: 10.1371/journal.pone.0003107 (PMC2528002; doi:10.1371/journal.pone.0003107)
Supplement: Dataset S1 — Supporting information on the hAT superfamily (0.50 MB XLS) [file pone.0003107.s004.xls]

## Sheet: Info
This dataset contains a list of sequences in which the given TEs were found.
It gives information of the putative size of the element (blasted against the full lenght representative).
Columns E-H give informaiton on the number of elements with complete (or almost complete) transposases as well as the presence of functional ORFs.
Columns J-M give information of the ESTs that hit to the TE family.

## Sheet: Vinesleeper-1
hAT-3 is present in single copy. No TIRs found it has 2070 bp of putative TPase.		EST hitting the ORF
		DT011157.1	Clone VVH015G11	flower	5' read	CabSau Flower Nectary Stage 25 (NECu0025)
am486739		DT011724.1	Clone VVH022B01	flower	5' read	CabSau Flower Nectary Stage 25 (NECu0025)
		DT011843.1	Clone VVH023E06	flower	5' read	CabSau Flower Nectary Stage 25 (NECu0025)
		EC925357.1	WIN028.TB24.1_J15 Cab Sauv flower, leaf and root non-normalized (WIN02) Vitis vinifera cDNA clone WIN028_J15 3', mRNA sequence.

## Sheet: Vinesleeper-2
am487463
single copy, TPase 2.03 kb long
similar to DAYSLEEPER like Vinesleeper-1, but only 72% identical to Vinesleeper-1.
ESTs:
DT010121.1	CabSau Flower Nectary Stage 25 (NECu0025)
FC056202.1	sT7aVVM_AER54D04 VVM Vitis vinifera cDNA clone VVM_AER54D04 5		An expressed sequence tag (EST) collection from abiotically stressed roots of grape vine	Cabernet Sauvignon
CF510931.1	cabernet sauvignon	bud
CF510844.1	cabernet sauvignon	bud
CF404746.1	CabSau Berry Preveraison Stage 32
EE072636	Berries veraison stage (VvC4)	cultivar="Carmenere
EE069360.1	Clusters 4 cm	cultivar="Carmenere
CD004786.1	Chardonnay	An expressed sequence tag database for abiotic stressed leaves of Vitis vinifera
DV223145.1	CabSau Flower Stage 12	Length=414
DV221287.1	CabSau Flower Stage 12	Length=414	redundant
DV219485.1	CabSau Flower Stage 12	Length=414	redundant
DV219449.1	CabSau Flower Stage 12	Length=414	redundant
CB003915.1	Chardonnay	An expressed sequence tag database for abiotic stressed leaves of Vitis vinifera
CD011852.1	Chardonnay	An expressed sequence tag database for abiotic stressed leaves of Vitis vinifera

## Sheet: Hatvine-1
accession	coverage	bp		querry length:	5547	good ORF	>90% TPase >80% identity				shotgun source	ESTs hitting TPase
AM444020	1	5547					accession	coverage	identity			full length hit to 5' of TPase
AM451243	1	5547					AM446974.1	1	0.86		AM428603	DT029040.1	VVL030A04_679706 CabSau Berry Postveraison Mixed Stages 36-38 (Brix > 15) under water deficit stress Vitis vinifera cDNA clone VVL030A04 5, mRNA sequence.Length=666
AM455058	1	5547					AM474652.1	1	0.86		AM450511	CF513889.1	CAbud0007_IIIR_A02 Vitis vinifera cv. cabernet sauvignon (Clone 8) Bud - CABUD Vitis vinifera cDNA clone CAbud0007_IIIR_A02 3', mRNA sequence.Length=966
AM473334	1	5547					AM444255.2	1	0.87
AM477724	1	5547					AM444525.1	1	0.87			full length hit to midle of TPase
AM424749	0.99	5491.53					AM459539.1	1	0.87		AM433991.2, AM437902.2, AM444020.2, AM477724.2, AM429720.2, AM465617.1	CB001775.1	VVB008G09_125012 An expressed sequence tag database for abiotic stressed leaves of Vitis vinifera var. Chardonnay Vitis vinifera cDNA clone VVB008G09 5, mRNA sequence.Length=682
AM426806	0.99	5491.53					AM440328.1	1	0.88		AM450511.1	CF513803.1	CAbud0007_IIIF_A02 Vitis vinifera cv. cabernet sauvignon (Clone 8) Bud - CABUD Vitis vinifera cDNA clone CAbud0007_IIIF_A02 5', mRNA sequence.Length=990
AM431573	0.99	5491.53					AM445015.2	1	0.88		AM475813.2, AM451243.2	CD012001.1	VVB008G09_393609 An expressed sequence tag database for abiotic stressed leaves of Vitis vinifera var. Chardonnay Vitis vinifera cDNA clone VVB008G09 5, mRNA sequence.Length=484
AM436486	0.99	5491.53					AM454314.1	1	0.88		AM474652.1	CD712458.1VVB012F12_403263 An expressed sequence tag database for abiotic stressed leaves of Vitis vinifera var. Chardonnay Vitis vinifera cDNA clone VVB012F12 5, mRNA sequence.Length=397
AM470024	0.99	5491.53					AM467497.2	1	0.88
AM471557	0.99	5491.53					AM488786.2	1	0.88			full length hit to end of TPase + 5' UTR
AM471774	0.99	5491.53					AM459813.2	1	0.89		AM463679.2, AM444020.2, AM482526.1	CB004326.1	VVB038C06_229248 An expressed sequence tag database for abiotic stressed leaves of Vitis vinifera var. Chardonnay Vitis vinifera cDNA clone VVB038C06 5, mRNA sequence.Length=720
AM474652	0.99	5491.53					AM471251.2	1	0.9
AM485685	0.99	5491.53					AM425795.2	1	0.91			EV241217.1	VV_PEd0016f09.g1 Vitis vinifera cv. perlette LibD Vitis vinifera cDNA, mRNA sequence.Length=1025
AM425795	0.98	5436.06					AM432432.2	1	0.91			EV241242.1	VV_PEd0016g10.b1 Vitis vinifera cv. perlette LibD Vitis vinifera cDNA, mRNA sequence.Length=1013
AM459397	0.98	5436.06					AM446807.2	1	0.91
AM483129	0.98	5436.06					AM456470.1	1	0.91
AM489256	0.98	5436.06					AM471871.2	1	0.91
AM456700	0.97	5380.59					AM439154.2	1	0.92
AM459813	0.96	5325.12					AM456657.2	1	0.92
AM433991	0.95	5269.65					AM487575.2	1	0.92
AM462195	0.95	5269.65					AM489256.2	1	0.92
AM467115	0.95	5269.65					AM429113.2	1	0.93
AM429113	0.94	5214.18				1	AM436486.2	1	0.93
AM432432	0.94	5214.18					AM467550.2	1	0.93
AM465670	0.94	5214.18					AM483129.2	1	0.93
AM445484	0.92	5103.24					AM485685.2	1	0.93
AM459539	0.92	5103.24					AM424749.2	1	0.94
AM466828	0.92	5103.24					AM429957.2	1	0.94
AM429957	0.91	5047.77					AM434897.2	1	0.94
AM458526	0.91	5047.77					AM444312.1	1	0.94
AM463322	0.91	5047.77					AM445484.2	1	0.94
AM436872	0.89	4936.83					AM447752.2	1	0.94
AM457780	0.88	4881.36					AM465670.2	1	0.94
AM446807	0.87	4825.89					AM470024.1	1	0.94
AM429720	0.86	4770.42					AM477406.1	1	0.94
AM437751	0.86	4770.42					AM482282.2	1	0.94
AM467497	0.86	4770.42					AM431573.2	1	0.95
AM473000	0.86	4770.42					AM437751.2	1	0.95
AM473501	0.86	4770.42					AM445085.2	1	0.95
AM477406	0.86	4770.42					AM445387.1	1	0.95
AM434897	0.85	4714.95					AM451243.2	1	0.95
AM440328	0.85	4714.95					AM455058.1	1	0.95
AM444255	0.85	4714.95					AM456688.2	1	0.95
AM445857	0.85	4714.95					AM456700.2	1	0.95
AM446974	0.85	4714.95					AM459818.2	1	0.95
AM462106	0.84	4659.48					AM462195.2	1	0.95
AM467550	0.81	4493.07					AM466828.2	1	0.95
AM482282	0.81	4493.07					AM467115.2	1	0.95
AM427734	0.8	4437.6					AM471557.1	1	0.95
AM432455	0.8	4437.6				1	AM471774.2	1	0.95
AM456657	0.8	4437.6				1	AM473000.1	1	0.95
AM459818	0.8	4437.6				1	AM473501.2	1	0.95
AM448318	0.78	4326.66				1	AM426806.2	1	0.96
AM463757	0.78	4326.66					AM432557.1	1	0.96
AM428603	0.76	4215.72					AM433991.2	1	0.96
AM479024	0.76	4215.72					AM444020.2	1	0.96
AM481782	0.76	4215.72				1	AM473334.2	1	0.96
AM487106	0.76	4215.72					AM477724.2	1	0.96
AM437902	0.75	4160.25					AM427567.1	1	0.97
AM446719	0.75	4160.25					AM432073.2	1	0.97
AM424395	0.74	4104.78					AM434863.2	1	0.97
AM428105	0.74	4104.78					AM437421.2	1	0.97
AM450564	0.74	4104.78					AM437764.2	1	0.97
AM487051	0.74	4104.78					AM439663.2	1	0.97
AM457078	0.73	4049.31					AM448354.2	1	0.97
AM464270	0.73	4049.31					AM482634.1	1	0.97
AM437764	0.72	3993.84					AM443760.2	1	0.98
AM444525	0.72	3993.84					AM455259.2	1	0.98
AM451640	0.72	3993.84					AM456362.2	1	0.98
AM464269	0.72	3993.84					AM467332.2	1	0.98
AM464499	0.72	3993.84					AM475307.1	1	0.98
AM467332	0.71	3938.37					AM424371.2	0.99	0.82
AM475307	0.71	3938.37					AM429632.2	0.99	0.82
AM449640	0.7	3882.9					AM462590.2	0.99	0.82
AM448354	0.69	3827.43					AM424819.2	0.99	0.83
AM451458	0.69	3827.43					AM470605.2	0.99	0.83
AM480690	0.69	3827.43					AM472953.1	0.99	0.83
AM489207	0.69	3827.43					AM424395.2	0.99	0.84
AM424576	0.68	3771.96					AM424576.2	0.99	0.84
AM425074	0.68	3771.96					AM450511.1	0.99	0.84
AM433105	0.68	3771.96					AM464642.1	0.99	0.84
AM433222	0.68	3771.96					AM477134.1	0.99	0.84
AM439154	0.68	3771.96					AM487106.1	0.99	0.84
AM456362	0.68	3771.96					AM425074.1	0.99	0.85
AM472953	0.68	3771.96					AM428105.2	0.99	0.85
AM473916	0.68	3771.96					AM433222.2	0.99	0.85
AM432557	0.67	3716.49					AM464270.2	0.99	0.85
AM434863	0.67	3716.49					AM470563.2	0.99	0.85
AM439663	0.67	3716.49					AM479469.2	0.99	0.85
AM450511	0.67	3716.49					AM480608.1	0.99	0.85
AM456625	0.67	3716.49					AM436411.1	0.99	0.86
AM462590	0.67	3716.49					AM448318.1	0.99	0.86
AM471251	0.67	3716.49					AM464499.2	0.99	0.86
AM478309	0.67	3716.49					AM479024.2	0.99	0.86
AM480608	0.67	3716.49					AM485412.2	0.99	0.86
AM432073	0.66	3661.02				1	AM428603.2	0.99	0.87
AM444312	0.66	3661.02					AM432455.1	0.99	0.87
AM445387	0.66	3661.02					AM438680.2	0.99	0.87
AM486964	0.66	3661.02					AM444657.2	0.99	0.87
AM487575	0.66	3661.02					AM449640.2	0.99	0.87
AM427567	0.65	3605.55					AM456625.2	0.99	0.87
AM432752	0.65	3605.55					AM464269.1	0.99	0.87
AM447752	0.65	3605.55					AM478309.2	0.99	0.87
AM470563	0.65	3605.55					AM480690.1	0.99	0.87
AM482634	0.65	3605.55					AM487051.2	0.99	0.87
AM487325	0.65	3605.55					AM489207.2	0.99	0.87
AM443760	0.64	3550.08					AM427734.2	0.99	0.88
AM445085	0.64	3550.08					AM457780.2	0.99	0.88
AM471871	0.64	3550.08					AM462106.1	0.99	0.89
AM471908	0.64	3550.08					AM436872.1	0.99	0.92
AM448781	0.63	3494.61					AM452567.2	0.99	0.94
AM455259	0.63	3494.61					AM459397.2	0.99	0.94
AM456688	0.63	3494.61					AM429720.2	0.99	0.95
AM452567	0.62	3439.14					AM485834.2	0.99	0.95
AM477134	0.62	3439.14					AM464763.2	0.98	0.85
AM481892	0.62	3439.14					AM464479.2	0.98	0.89
AM485412	0.62	3439.14					AM437902.2	0.98	0.96
AM424819	0.61	3383.67					AM433105.2	0.97	0.87
AM427352	0.61	3383.67					AM427352.2	0.97	0.9
AM429632	0.61	3383.67					AM445857.2	0.97	0.93
AM438680	0.61	3383.67					AM430653.2	0.97	0.94
AM455751	0.61	3383.67					AM455751.2	0.96	0.84
AM439738	0.6	3328.2					AM446719.1	0.95	0.81
AM464763	0.6	3328.2					AM479461.2	0.95	0.84
AM479469	0.6	3328.2					AM457078.1	0.94	0.94
AM484458	0.6	3328.2					AM487325.2	0.93	0.87
AM434662	0.59	3272.73					AM463757.2	0.93	0.95
AM437421	0.59	3272.73					AM458526.1	0.93	0.96
AM439224	0.59	3272.73
AM440541	0.59	3272.73
AM445015	0.59	3272.73
AM456470	0.59	3272.73
AM479461	0.59	3272.73
AM436411	0.58	3217.26
AM464579	0.58	3217.26
AM465617	0.58	3217.26
AM488786	0.57	3161.79
AM431141	0.56	3106.32
AM476945	0.56	3106.32
AM442220	0.55	3050.85
AM465057	0.55	3050.85
AM425482	0.54	2995.38
AM428729	0.53	2939.91
AM431774	0.53	2939.91
AM433666	0.53	2939.91
AM436723	0.53	2939.91
AM440380	0.53	2939.91
AM470605	0.53	2939.91
AM472296	0.53	2939.91
AM484498	0.53	2939.91
AM487127	0.53	2939.91
AM443677	0.52	2884.44
AM464904	0.52	2884.44
AM451159	0.51	2828.97
AM461365	0.51	2828.97
AM487291	0.51	2828.97
AM424393	0.5	2773.5
AM437032	0.5	2773.5
AM441425	0.5	2773.5
AM461572	0.5	2773.5
AM485411	0.5	2773.5
AM439594	0.49	2718.03
AM454314	0.49	2718.03
AM462802	0.49	2718.03
AM464479	0.49	2718.03
AM472001	0.49	2718.03
AM472687	0.49	2718.03
AM484812	0.49	2718.03
AM444657	0.48	2662.56
AM454385	0.48	2662.56
AM475813	0.48	2662.56
AM479330	0.48	2662.56
AM438781	0.47	2607.09
AM440772	0.47	2607.09
AM430653	0.46	2551.62
AM431018	0.46	2551.62
AM446338	0.46	2551.62
AM464642	0.46	2551.62
AM470752	0.46	2551.62
AM487853	0.46	2551.62
AM424371	0.45	2496.15
AM434274	0.45	2496.15
AM443498	0.45	2496.15
AM447180	0.45	2496.15
AM449613	0.45	2496.15
AM453233	0.45	2496.15
AM485834	0.45	2496.15
AM442464	0.44	2440.68
AM449330	0.44	2440.68
AM451778	0.44	2440.68
AM470466	0.44	2440.68
AM423707	0.43	2385.21
AM436670	0.43	2385.21
AM438316	0.43	2385.21
AM440954	0.43	2385.21
AM463852	0.43	2385.21
AM427978	0.42	2329.74
AM454803	0.42	2329.74
AM459129	0.42	2329.74
AM469814	0.42	2329.74
AM481669	0.42	2329.74
AM485766	0.42	2329.74
AM435752	0.41	2274.27
AM460736	0.4	2218.8
AM429860	0.39	2163.33
AM441052	0.39	2163.33
AM463679	0.39	2163.33
AM482526	0.39	2163.33
AM483725	0.39	2163.33
AM438533	0.38	2107.86
AM441891	0.38	2107.86
AM442908	0.38	2107.86
AM445924	0.38	2107.86
AM451587	0.38	2107.86
AM456436	0.38	2107.86
AM462512	0.38	2107.86
AM474800	0.38	2107.86
AM475016	0.38	2107.86
AM448974	0.37	2052.39
AM460772	0.37	2052.39
AM482872	0.37	2052.39
AM488461	0.37	2052.39
AM467376	0.36	1996.92
AM426798	0.35	1941.45
AM447877	0.35	1941.45
AM468835	0.35	1941.45
AM432418	0.34	1885.98
AM433639	0.34	1885.98
AM435622	0.34	1885.98
AM451870	0.34	1885.98
AM470362	0.34	1885.98
AM470859	0.34	1885.98
AM475548	0.34	1885.98
AM476578	0.34	1885.98
AM481300	0.34	1885.98
AM486096	0.34	1885.98
AM428356	0.33	1830.51
AM429223	0.33	1830.51
AM452383	0.33	1830.51
AM458697	0.33	1830.51
AM463897	0.33	1830.51
AM456312	0.32	1775.04
AM461861	0.32	1775.04
AM471709	0.32	1775.04
AM485505	0.32	1775.04
AM447145	0.31	1719.57
AM462461	0.31	1719.57
AM425974	0.3	1664.1
AM427181	0.3	1664.1
AM428339	0.3	1664.1
AM429100	0.3	1664.1
AM441917	0.3	1664.1
AM444231	0.3	1664.1
AM445106	0.3	1664.1
AM450904	0.3	1664.1
AM456487	0.3	1664.1
AM484427	0.3	1664.1
AM487050	0.3	1664.1
AM432815	0.29	1608.63
AM438370	0.29	1608.63
AM442285	0.29	1608.63
AM444581	0.29	1608.63
AM464295	0.29	1608.63
AM469426	0.29	1608.63
AM472969	0.29	1608.63
AM473355	0.29	1608.63
AM475770	0.29	1608.63
AM430548	0.28	1553.16
AM435363	0.28	1553.16
AM446513	0.28	1553.16
AM465688	0.28	1553.16
AM474516	0.28	1553.16
AM475135	0.28	1553.16
AM488067	0.28	1553.16
AM434100	0.27	1497.69
AM448954	0.27	1497.69
AM458198	0.27	1497.69
AM465730	0.27	1497.69
AM468572	0.27	1497.69
AM484967	0.27	1497.69
AM485383	0.27	1497.69
AM431594	0.26	1442.22
AM433782	0.26	1442.22
AM446206	0.26	1442.22
AM447251	0.26	1442.22
AM455564	0.26	1442.22
AM458605	0.26	1442.22
AM461073	0.26	1442.22
AM462258	0.26	1442.22
AM468141	0.26	1442.22
AM469305	0.26	1442.22
AM472891	0.26	1442.22
AM473962	0.26	1442.22
AM476941	0.26	1442.22
AM479820	0.26	1442.22
AM480910	0.26	1442.22
AM482839	0.26	1442.22
AM424171	0.25	1386.75
AM427075	0.25	1386.75
AM427190	0.25	1386.75
AM428842	0.25	1386.75
AM429284	0.25	1386.75
AM433587	0.25	1386.75
AM434514	0.25	1386.75
AM436298	0.25	1386.75
AM440601	0.25	1386.75
AM447580	0.25	1386.75
AM448132	0.25	1386.75
AM452905	0.25	1386.75
AM453084	0.25	1386.75
AM454424	0.25	1386.75
AM459150	0.25	1386.75
AM459719	0.25	1386.75
AM465443	0.25	1386.75
AM470477	0.25	1386.75
AM479148	0.25	1386.75
AM479934	0.25	1386.75
AM485466	0.25	1386.75
AM423700	0.24	1331.28
AM439669	0.24	1331.28
AM440532	0.24	1331.28
AM447023	0.24	1331.28
AM459667	0.24	1331.28
AM464489	0.24	1331.28
AM481143	0.24	1331.28
AM483561	0.24	1331.28
AM431592	0.23	1275.81
AM435356	0.23	1275.81
AM441911	0.23	1275.81
AM452016	0.23	1275.81
AM457236	0.23	1275.81
AM472963	0.23	1275.81
AM426637	0.22	1220.34
AM427070	0.22	1220.34
AM447612	0.22	1220.34
AM461771	0.22	1220.34
AM469136	0.22	1220.34
AM428115	0.21	1164.87
AM428436	0.21	1164.87
AM432849	0.21	1164.87
AM432968	0.21	1164.87
AM434094	0.21	1164.87
AM434813	0.21	1164.87
AM435224	0.21	1164.87
AM435521	0.21	1164.87
AM439593	0.21	1164.87
AM440641	0.21	1164.87
AM441443	0.21	1164.87
AM445473	0.21	1164.87
AM446552	0.21	1164.87
AM449654	0.21	1164.87
AM453197	0.21	1164.87
AM455493	0.21	1164.87
AM460393	0.21	1164.87
AM461063	0.21	1164.87
AM461454	0.21	1164.87
AM461546	0.21	1164.87
AM462610	0.21	1164.87
AM464980	0.21	1164.87
AM467867	0.21	1164.87
AM468436	0.21	1164.87
AM468759	0.21	1164.87
AM470857	0.21	1164.87
AM471304	0.21	1164.87
AM472641	0.21	1164.87
AM478079	0.21	1164.87
AM479946	0.21	1164.87
AM480142	0.21	1164.87
AM480304	0.21	1164.87
AM480787	0.21	1164.87
AM481015	0.21	1164.87
AM481424	0.21	1164.87
AM482277	0.21	1164.87
AM482373	0.21	1164.87
AM484778	0.21	1164.87
AM486009	0.21	1164.87
AM487946	0.21	1164.87
AM488716	0.21	1164.87
AM488989	0.21	1164.87

## Sheet: Hatvine-2
accession	coverage	bp		good ORF	>90% TPase >80% identity				shotgun	ESTs hitting the 3' of the TPase gene including 3' UTR:
AM471252	1	4949			accession	querry coverage	max identity		AM477968.1	CD007290.1	Clone VVB075H09	leaf	5' read	An expressed sequence tag database for abiotic stressed leaves of Vitis vinifera var. Chardonnay.
AM488124	0.85	4206.65		1	AM425574	1	0.96		AM477968.1	CD007457.1	Clone VVB077G01	leaf	5' read	An expressed sequence tag database for abiotic stressed leaves of Vitis vinifera var. Chardonnay.
AM488658	0.83	4107.67			AM428115	1	0.9		AM477968.1	CD007652.1	Clone VVB073H02	leaf	5' read	An expressed sequence tag database for abiotic stressed leaves of Vitis vinifera var. Chardonnay.
AM460280	0.82	4058.18		1	AM429530	1	0.96		AM477968.1	CD007897.1	Clone VVB080F05	leaf	5' read	An expressed sequence tag database for abiotic stressed leaves of Vitis vinifera var. Chardonnay.
AM476260	0.82	4058.18			AM431517	1	0.92		AM477968.1	CD010394.1	Clone VVB111C02	leaf	5' read	An expressed sequence tag database for abiotic stressed leaves of Vitis vinifera var. Chardonnay.
AM425574	0.81	4008.69		1	AM432555	1	0.97		AM477968.1	CD011326.1	Clone VVB121G03	leaf	5' read	An expressed sequence tag database for abiotic stressed leaves of Vitis vinifera var. Chardonnay.
AM432555	0.81	4008.69			AM434525	1	0.92		AM477968.1	CD713207.1	Clone VVB187D07	leaf	5' read	An expressed sequence tag database for abiotic stressed leaves of Vitis vinifera var. Chardonnay.
AM435993	0.81	4008.69		1	AM434592	1	0.98		AM477968.1	CD714688.1	Clone VVB203G06	leaf	5' read	An expressed sequence tag database for abiotic stressed leaves of Vitis vinifera var. Chardonnay.
AM445363	0.8	3959.2		1	AM435993	1	0.96		AM477968.1	CD715345.1	Clone VVB211A01	leaf	5' read	An expressed sequence tag database for abiotic stressed leaves of Vitis vinifera var. Chardonnay.
AM434592	0.79	3909.71			AM436751	1	0.89		AM477968.1	CD716797.1	Clone VVB131E10	leaf	5' read	An expressed sequence tag database for abiotic stressed leaves of Vitis vinifera var. Chardonnay.
AM477356	0.79	3909.71			AM436937	1	0.93		AM477968.1	CD716410.1	Clone VVB128C10	leaf	5' read	An expressed sequence tag database for abiotic stressed leaves of Vitis vinifera var. Chardonnay.
AM478899	0.79	3909.71		1	AM438408	1	0.92		AM477968.1	CD719631.1	Clone VVB163C11	leaf	5' read	An expressed sequence tag database for abiotic stressed leaves of Vitis vinifera var. Chardonnay.
AM452268	0.78	3860.22			AM440282	1	0.94		AM456971	CF515371.1	Clone CAP0001_IVF_C06	leaf	5' read	Vitis vinifera cv. cabernet sauvignon (Clone 8) Petiole - CAP
AM462095	0.78	3860.22			AM440345	1	0.95		AM456971	CF515460.1	Clone CAP0001_IVR_C06	leaf	3' read	Vitis vinifera cv. cabernet sauvignon (Clone 8) Petiole - CAP
AM451687	0.77	3810.73		1	AM440485	1	0.97		AM477130	CO819061.1	Clone CSECS123H04	fruit	3' read	CabSau Normalised Berry Fruit Set Stage 28 (PREn0028)
AM431517	0.74	3662.26			AM444060	1	0.93
AM451592	0.74	3662.26			AM445363	1	0.96
AM465116	0.73	3612.77		1	AM448272	1	0.93
AM487761	0.73	3612.77			AM449150	1	0.96
AM429530	0.72	3563.28			AM449514	1	0.93
AM440282	0.72	3563.28			AM449676	1	0.92
AM441327	0.72	3563.28			AM449717	1	0.92
AM449150	0.72	3563.28			AM449902	1	0.88
AM458326	0.72	3563.28			AM450606	1	0.93
AM467040	0.72	3563.28			AM451592	1	0.95
AM477298	0.72	3563.28			AM451687	1	0.95
AM483506	0.72	3563.28			AM451947	1	0.9
AM486084	0.72	3563.28		1	AM452268	1	0.97
AM488047	0.72	3563.28			AM453306	1	0.95
AM432717	0.71	3513.79			AM454149	1	0.91
AM434525	0.71	3513.79			AM455806	1	0.93
AM440485	0.71	3513.79			AM456462	1	0.91
AM449514	0.71	3513.79			AM458326	1	0.94
AM486865	0.71	3513.79			AM458979	1	0.91
AM448272	0.7	3464.3			AM459074	1	0.93
AM459074	0.7	3464.3			AM459740	1	0.91
AM485094	0.7	3464.3			AM460280	1	0.97
AM434208	0.69	3414.81		1	AM462095	1	0.95
AM446827	0.69	3414.81		1	AM465116	1	0.98
AM448261	0.69	3414.81			AM466547	1	0.86
AM436751	0.68	3365.32			AM467040	1	0.93
AM438408	0.68	3365.32			AM468526	1	0.93
AM440345	0.68	3365.32		1	AM471252	1	0.97
AM441889	0.68	3365.32		1	AM476260	1	0.96
AM449717	0.68	3365.32			AM477298	1	0.94
AM450606	0.68	3365.32			AM477356	1	0.97
AM453393	0.68	3365.32			AM477528	1	0.91
AM454149	0.68	3365.32			AM478899	1	0.96
AM454894	0.68	3365.32		1	AM483506	1	0.93
AM455806	0.68	3365.32			AM485094	1	0.97
AM458979	0.68	3365.32		1	AM486084	1	0.92
AM459279	0.68	3365.32			AM486865	1	0.97
AM459740	0.68	3365.32			AM487276	1	0.91
AM464282	0.68	3365.32			AM487761	1	0.95
AM468526	0.68	3365.32			AM488047	1	0.96
AM477528	0.68	3365.32			AM488124	1	0.98
AM488356	0.68	3365.32			AM488356	1	0.91
AM423790	0.67	3315.83		1	AM488658	1	0.97
AM449902	0.67	3315.83			AM423790	0.99	0.87
AM451947	0.67	3315.83			AM424707	0.99	0.89
AM477602	0.67	3315.83			AM432717	0.99	0.9
AM432979	0.66	3266.34			AM432829	0.99	0.9
AM453306	0.66	3266.34		1	AM432979	0.99	0.89
AM458867	0.66	3266.34			AM434208	0.99	0.87
AM466547	0.66	3266.34		1	AM441327	0.99	0.93
AM477895	0.66	3266.34			AM441889	0.99	0.9
AM487974	0.66	3266.34			AM446827	0.99	0.88
AM428115	0.65	3216.85			AM448261	0.99	0.89
AM449676	0.65	3216.85			AM453393	0.99	0.92
AM482097	0.65	3216.85			AM454894	0.99	0.9
AM436937	0.64	3167.36			AM458867	0.99	0.87
AM444225	0.64	3167.36			AM459279	0.99	0.89
AM452704	0.64	3167.36			AM464282	0.99	0.93
AM487276	0.64	3167.36			AM466244	0.99	0.88
AM444060	0.62	3068.38			AM472879	0.99	0.86
AM471791	0.61	3018.89			AM474328	0.99	0.84
AM472879	0.61	3018.89			AM477602	0.99	0.88
AM432829	0.6	2969.4			AM477895	0.99	0.88
AM456462	0.6	2969.4			AM482097	0.99	0.82
AM470113	0.6	2969.4			AM487974	0.99	0.82
AM463660	0.59	2919.91			AM443739	0.98	0.91
AM474328	0.59	2919.91			AM444225	0.95	0.9
AM424707	0.57	2820.93			AM471791	0.94	0.96
AM433451	0.56	2771.44			AM476348	0.94	0.85
AM442871	0.56	2771.44			AM483798	0.94	0.89
AM466244	0.56	2771.44			AM452704	0.93	0.88
AM443215	0.55	2721.95			AM470113	0.92	0.92
AM476348	0.55	2721.95			AM480064	0.92	0.91
AM480668	0.55	2721.95		1	AM433451	0.91	0.93
AM443739	0.54	2672.46			AM476231	0.91	0.94
AM457487	0.54	2672.46
AM476231	0.54	2672.46
AM460170	0.53	2622.97
AM480064	0.53	2622.97
AM424031	0.52	2573.48
AM457485	0.5	2474.5
AM483798	0.5	2474.5
AM479593	0.49	2425.01
AM453375	0.47	2326.03
AM460697	0.47	2326.03
AM458018	0.46	2276.54
AM427912	0.45	2227.05
AM428531	0.44	2177.56
AM451808	0.44	2177.56
AM462784	0.44	2177.56
AM471416	0.44	2177.56
AM425826	0.43	2128.07
AM430945	0.43	2128.07
AM446764	0.42	2078.58
AM487503	0.41	2029.09
AM460029	0.4	1979.6
AM467985	0.4	1979.6
AM477968	0.4	1979.6
AM437123	0.39	1930.11
AM464266	0.39	1930.11
AM466941	0.39	1930.11
AM478146	0.39	1930.11
AM435839	0.38	1880.62
AM462666	0.38	1880.62
AM479881	0.38	1880.62
AM481121	0.38	1880.62
AM477534	0.37	1831.13
AM440608	0.34	1682.66
AM424975	0.33	1633.17
AM449825	0.33	1633.17
AM464740	0.33	1633.17
AM424839	0.32	1583.68
AM432964	0.32	1583.68
AM477002	0.32	1583.68
AM435306	0.31	1534.19
AM436924	0.31	1534.19
AM464727	0.31	1534.19
AM470443	0.31	1534.19
AM488969	0.31	1534.19
AM429919	0.3	1484.7
AM428637	0.29	1435.21
AM452672	0.29	1435.21
AM483986	0.29	1435.21
AM431119	0.28	1385.72
AM477557	0.28	1385.72
AM440713	0.27	1336.23
AM473395	0.27	1336.23
AM436541	0.26	1286.74
AM445292	0.26	1286.74
AM465179	0.26	1286.74
AM443488	0.25	1237.25
AM466001	0.25	1237.25
AM467223	0.25	1237.25
AM427722	0.24	1187.76
AM469896	0.24	1187.76
AM489171	0.23	1138.27
AM426404	0.22	1088.78
AM428788	0.22	1088.78
AM431868	0.22	1088.78
AM446659	0.22	1088.78
AM461555	0.21	1039.29
AM481350	0.21	1039.29

## Sheet: Hatvine-3
accession	coverage	bp		good ORF	>90% TPase >80% identity		best hit to:	ESTs hitting the TPase:
AM430617	1	4048		1	AM477213		AM464610.2	>gb|CF516927.1|	CAP0004_IIF_G12 Vitis vinifera cv. cabernet sauvignon (Clone 8) Petiole - CAP Vitis vinifera cDNA clone CAP0004_IIF_G12 5', mRNA sequence.865bp
AM435654	1	4048		1	AM429755		AM464610.2	>gb|CF517011.1|	CAP0004_IIR_G12 Vitis vinifera cv. cabernet sauvignon (Clone 8) Petiole - CAP Vitis vinifera cDNA clone CAP0004_IIR_G12 3', mRNA sequence.685bp
AM438839	1	4048			AM446276
AM439355	1	4048			AM477721			these ESTs hit before the TPase:
AM446276	1	4048		1	AM448299			>gb|DV939180.1|	CSECS189F01_INFu0031 CabSau Immature Inflorescence Stage 31 (INFu0031) Vitis vinifera cDNA clone CSECS189F01 3', mRNA sequence.
AM447853	1	4048		frameshift	AM488244
AM448299	1	4048		1	AM457508			2 more ESTs hit partially after the TPase, toward the 3' TIR
AM449165	1	4048		1	AM483425
AM452023	1	4048		1	AM435654
AM454401	1	4048		1	AM472489
AM457508	1	4048			AM458267
AM458066	1	4048		1	AM438839
AM464355	1	4048			AM458066
AM467253	1	4048		1	AM443944
AM470159	1	4048		1	AM450939
AM472489	1	4048		1	AM454401
AM473527	1	4048		1	AM467253
AM477213	1	4048		1	AM473527
AM477721	1	4048			AM475865
AM480712	1	4048		1	AM480712
AM483425	1	4048			AM452023
AM484600	1	4048		1	AM484600
AM488244	1	4048			AM443159
AM429755	0.99	4007.52			AM435315
AM432104	0.99	4007.52			AM444151
AM435315	0.99	4007.52		1	AM449709
AM442136	0.99	4007.52		1	AM440703
AM449709	0.99	4007.52			AM447827
AM450939	0.99	4007.52		1	AM458757
AM455876	0.99	4007.52		1	AM464217
AM469394	0.99	4007.52		1	AM424678
AM469982	0.99	4007.52			AM486977b
AM439926	0.98	3967.04			AM447663
AM440752	0.98	3967.04			AM453893
AM443159	0.98	3967.04			AM424943
AM443944	0.98	3967.04			AM448314
AM424678	0.97	3926.56			AM425683
AM426734	0.97	3926.56			AM483546
AM438219	0.97	3926.56			AM426803
AM447827	0.97	3926.56		1	AM475212
AM448314	0.97	3926.56			AM426734
AM458757	0.97	3926.56			AM460139
AM431263	0.96	3886.08			AM489361
AM444151	0.96	3886.08			AM431263
AM460139	0.96	3886.08			AM425576
AM464217	0.96	3886.08			AM487923
AM425683	0.95	3845.6			AM439926
AM461145	0.95	3845.6			AM460620
AM486232	0.95	3845.6			AM488235
AM458267	0.94	3805.12			AM481260
AM472124	0.94	3805.12			AM488716
AM486977	0.94	3805.12			AM442663
AM487218	0.94	3805.12			AM486232
AM447663	0.93	3764.64			AM486977
AM452620	0.93	3764.64			AM452805
AM483546	0.93	3764.64			AM427944
AM440191	0.92	3724.16			AM440752
AM460722	0.92	3724.16			AM438219
AM464610	0.92	3724.16			AM440191
AM488716	0.92	3724.16			AM452620
AM424623	0.91	3683.68			AM438370
AM424943	0.91	3683.68			AM453578
AM438370	0.91	3683.68			AM439290
AM478555	0.91	3683.68			AM461145
AM427944	0.9	3643.2			AM460722
AM425576	0.89	3602.72			AM439355
AM437832	0.89	3602.72			AM487218
AM439290	0.89	3602.72			AM489370
AM462232	0.89	3602.72		1	AM478555
AM474584	0.89	3602.72		1	AM424623
AM489361	0.87	3521.76			AM437832
AM453893	0.86	3481.28		1	AM469394
AM475865	0.83	3359.84		1	AM464610
AM481260	0.82	3319.36			AM452540
AM434609	0.81	3278.88		1	AM447853
AM460620	0.81	3278.88		1	AM432104
AM489370	0.81	3278.88			AM469982
AM442663	0.8	3238.4			AM464355
AM452540	0.8	3238.4		1	AM442136
AM453578	0.8	3238.4			AM470159
AM426803	0.79	3197.92			AM455876
AM452805	0.79	3197.92			AM430617
AM489085	0.79	3197.92
AM460055	0.78	3157.44
AM488235	0.78	3157.44
AM487923	0.77	3116.96
AM440703	0.75	3036
AM475212	0.74	2995.52
AM462723	0.73	2955.04
AM426947	0.7	2833.6
AM483182	0.7	2833.6
AM434252	0.69	2793.12
AM484093	0.65	2631.2
AM468613	0.64	2590.72
AM427612	0.63	2550.24
AM467986	0.62	2509.76
AM474398	0.62	2509.76
AM424761	0.59	2388.32
AM440310	0.58	2347.84
AM448075	0.58	2347.84
AM456221	0.58	2347.84
AM464488	0.58	2347.84
AM441621	0.57	2307.36
AM480643	0.55	2226.4
AM487183	0.55	2226.4
AM428744	0.53	2145.44
AM448578	0.53	2145.44
AM483872	0.53	2145.44
AM461194	0.52	2104.96
AM466922	0.5	2024
AM466362	0.49	1983.52
AM460230	0.48	1943.04
AM431019	0.47	1902.56
AM447542	0.47	1902.56
AM425107	0.46	1862.08
AM467310	0.46	1862.08
AM481671	0.44	1781.12
AM470646	0.43	1740.64
AM445003	0.42	1700.16
AM450524	0.41	1659.68
AM475985	0.41	1659.68
AM430296	0.39	1578.72
AM426106	0.38	1538.24
AM452413	0.37	1497.76
AM471422	0.36	1457.28
AM478865	0.36	1457.28
AM485365	0.36	1457.28
AM429522	0.35	1416.8
AM436099	0.35	1416.8
AM435485	0.34	1376.32
AM468940	0.34	1376.32
AM436395	0.33	1335.84
AM453172	0.32	1295.36
AM474429	0.32	1295.36
AM458964	0.31	1254.88
AM482492	0.31	1254.88
AM483430	0.31	1254.88
AM456362	0.3	1214.4
AM460126	0.3	1214.4
AM474896	0.3	1214.4
AM450285	0.29	1173.92
AM452919	0.29	1173.92
AM454899	0.29	1173.92
AM470687	0.29	1173.92
AM489015	0.29	1173.92
AM441171	0.28	1133.44
AM441944	0.28	1133.44
AM460847	0.28	1133.44
AM469368	0.28	1133.44
AM470490	0.28	1133.44
AM473033	0.28	1133.44
AM480714	0.28	1133.44
AM439879	0.27	1092.96
AM442220	0.27	1092.96
AM466009	0.27	1092.96
AM466500	0.27	1092.96
AM479111	0.27	1092.96
AM461042	0.26	1052.48
AM433900	0.25	1012
AM438597	0.25	1012
AM474945	0.25	1012
AM482371	0.25	1012
AM463096	0.24	971.52
AM489273	0.24	971.52
AM426473	0.23	931.04
AM429400	0.23	931.04
AM433867	0.23	931.04
AM469170	0.23	931.04
AM435476	0.22	890.56
AM441304	0.22	890.56
AM443222	0.22	890.56
AM444494	0.22	890.56
AM445461	0.22	890.56
AM445762	0.22	890.56
AM450850	0.22	890.56
AM455390	0.22	890.56
AM456365	0.22	890.56
AM465161	0.22	890.56
AM474934	0.22	890.56
AM479793	0.22	890.56
AM424004	0.21	850.08
AM424875	0.21	850.08
AM430297	0.21	850.08
AM433213	0.21	850.08
AM453065	0.21	850.08
AM461172	0.21	850.08
AM486857	0.21	850.08

## Sheet: Hatvine-4
hAT-2 is present in single copy. No TIRs found.
no hits to ESTs
am480519

## Sheet: Hatvine-5
hAT-4 is present in single copy.	ESTs hitting the ORF (spliced, confirm the presence of the intron)
am478512	BQ796384.1	Clone RT034F02	fruit	3' read	Shiraz	Ripening Grape berries Lambda Zap II Library Vitis
	CF415495.1	Clone CSECS097E05	fruit	3' read	CabSau Normalised Berry Postveraison Stage 36 (POSn0036)
	DV940244.1	Clone CSECS178E03	fruit		CabSau Berry Postveraison Stage 38 (POSu0038)
it has a putatvie exon in front of the TPase which has a CD for photosystem but no ESTs confirming the trancription with the TPase.

## Sheet: Hatvine-6
accession	coverage	bp		good ORF	>90% TPase >80% identity		ESTs hitting the TPase
AM446777	1	5763		1	AM427866		>gb|CD013405.1|	UniGene info VVC021H09_396419 An expressed sequence tag database for abiotic stressed berries of Vitis vinifera var. Chardonnay Vitis
AM478392	0.78	4495.14		1	AM464072		>gb|CD012535.1|	VVC021H09_394679 An expressed sequence tag database for abiotic stressed berries of Vitis vinifera var. Chardonnay Vitis
AM426229	0.76	4379.88		1	AM459754
AM440250	0.75	4322.25		1 stop	AM426693		note that they hit partially. They fully correspond to sequence AM425718.2 which has 13% of full length TE
AM465501	0.65	3745.95			AM467429
AM433448	0.59	3400.17			AM455411
AM429720	0.58	3342.54		1	AM461994
AM484107	0.58	3342.54		1	AM444614
AM487130	0.58	3342.54			AM467040
AM489159	0.58	3342.54			AM442643
AM471694	0.54	3112.02			AM439643
AM481363	0.54	3112.02			AM442643b
AM423660	0.53	3054.39			AM457388
AM473606	0.53	3054.39			AM448269
AM438160	0.51	2939.13			AM473969
AM437814	0.5	2881.5			AM441409
AM441409	0.49	2823.87			AM477965
AM468497	0.49	2823.87		1	AM468497
AM432866	0.48	2766.24			AM481363
AM451034	0.45	2593.35		1	AM451034
AM448269	0.44	2535.72		1	AM471694
AM457388	0.44	2535.72		1	AM473606
AM477965	0.43	2478.09		1	AM433448
AM444614	0.42	2420.46		1	AM465501
AM426693	0.41	2362.83		1 stop	AM423660
AM427866	0.41	2362.83		1	AM426229
AM439643	0.41	2362.83		1 frameshift	AM446777
AM442643	0.41	2362.83		1 frameshift	AM489159
AM455411	0.41	2362.83		1	AM432866
AM459754	0.41	2362.83			AM438160
AM461994	0.41	2362.83		1	AM440250
AM464072	0.41	2362.83		1	AM487130
AM467040	0.41	2362.83			AM429720
AM467429	0.41	2362.83		1	AM484107
AM473969	0.41	2362.83		1	AM483942
AM483942	0.4	2305.2
AM475348	0.39	2247.57
AM478195	0.39	2247.57
AM480263	0.39	2247.57
AM431960	0.38	2189.94
AM467119	0.38	2189.94
AM484570	0.37	2132.31
AM485495	0.36	2074.68
AM488951	0.35	2017.05
AM478898	0.33	1901.79
AM435142	0.32	1844.16
AM457955	0.32	1844.16
AM464738	0.31	1786.53
AM425426	0.29	1671.27
AM427558	0.29	1671.27
AM445268	0.29	1671.27
AM451800	0.28	1613.64
AM432735	0.27	1556.01
AM464203	0.27	1556.01
AM448026	0.26	1498.38
AM461517	0.26	1498.38
AM468224	0.26	1498.38
AM480407	0.26	1498.38
AM480292	0.25	1440.75
AM439424	0.24	1383.12
AM489023	0.24	1383.12
AM446727	0.23	1325.49
AM482309	0.23	1325.49
AM439409	0.21	1210.23
AM449276	0.21	1210.23
AM450298	0.21	1210.23

## Sheet: Hatvine-7
accession	coverage	bp		good ORF	>90% TPase >80% identity		best shotgun hit:	ESTs hitting the TPase:
AM440154	1	3860		frameshift	AM479887			spliced ESTs
AM444007	1	3860		frameshift	AM478924		AM445309	>gb|CB007639.1|	VVC047F10_142334 An expressed sequence tag database for abiotic tressed berries of Vitis vinifera var. Chardonnay Vitis vinifera cDNA clone VVC047F10 5, mRNA sequence.
AM452099	1	3860			AM459754		AM443216	>gb|CF517371.1|	CAP0005_IIR_G10 Vitis vinifera cv. cabernet sauvignon (Clone 8) Petiole - CAP Vitis vinifera cDNA clone CAP0005_IIR_G10 3', mRNA sequence.
AM458293	1	3860		1	AM467655
AM477643	1	3860			AM461950			non-spliced beginning of TPase
AM482509	1	3860		frameshift	AM476415		AM486523.2	CF513050.1	Clone CAbud0005_IVF_G05	bud	5' read	A	Vitis vinifera cv. cabernet sauvignon (Clone 8) Bud - CABUD
AM486963	1	3860		1 stop	AM477643		AM486523.2	CF517967.1	Clone CAP0005_IVF_G05	leaf	5' read	A	Vitis vinifera cv. cabernet sauvignon (Clone 8) Petiole - CAP
AM429223	0.99	3821.4			AM440154		AM486523.2	CF513129.1	Clone CAbud0005_IVR_G05	bud	3' read	A	Vitis vinifera cv. cabernet sauvignon (Clone 8) Bud - CABUD
AM433023	0.99	3821.4			AM461957
AM436312	0.99	3821.4			AM434927			non-spliced mid TPase
AM438062	0.99	3821.4		1	AM482509		AM458293.2, AM459754.1, AM467655.1	>gb|CD012162.1|	VVB027D11_393931 An expressed sequence tag database for abiotic stressed leaves of Vitis vinifera var. Chardonnay Vitis vinifera cDNA clone VVB027D11 5, mRNA sequence.
AM439453	0.99	3821.4			AM458177		AM440154, AM458177	>gb|CB972764.1|	CAB30001_IVb_Fb_F05 Cabernet Sauvignon Berry Stage I - CAB3 Vitis vinifera cDNA clone CAB30001_IVb_Fb_F05 5', mRNA sequence.Length=213
AM448768	0.99	3821.4		1	AM438062		AM440154, AM458177	>gb|CB972691.1|	CAB30001_IVa_Ra_F05 Cabernet Sauvignon Berry Stage I - CAB3 Vitis vinifera cDNA clone CAB30001_IVa_Ra_F05 3', mRNA sequence.Length=225
AM454115	0.99	3821.4			AM457683		AM451778	>gb|CD007762.1|	VVB079A11_334652 An expressed sequence tag database for abiotic stressed leaves of Vitis vinifera var. Chardonnay Vitis vinifera cDNA clone VVB079A11 5, mRNA sequence.
AM454860	0.99	3821.4			AM426642
AM457683	0.99	3821.4		1	AM429223			non-spliced end TPase
AM458177	0.99	3821.4			AM427837		AM443216	AJ863005.1|	AJ863005 Vitis vinifera Cabernet-Sauvignon root Vitis vinifera cDNA clone RP02F03, mRNA sequence.Length=690
AM459754	0.99	3821.4			AM475093		AM472352	EC945428.1|	WIN0534.C21_M09 Cab Sauv flower, leaf and root normalized (WIN05) Vitis vinifera cDNA clone WIN0534_M09 3', mRNA sequence.Length=898
AM461950	0.99	3821.4			AM433023		AM427837,AM439453,AM444007,AM451412,AM454115,AM454860,AM458177,AM458293,AM461950,AM467655,AM478924,AM479887,AM486963	>gb|DT033639.1|	VVL084A03_688904 CabSau Berry Postveraison Mixed Stages 36-38 (Brix > 15) under water deficit stress Vitis vinifera cDNA clone VVL084A03 5, mRNA sequence.Length=469
AM461957	0.99	3821.4		1	AM462383		AM479887.2,AM478924.2,AM467655.1	DV220948.1|	VVI190D11_613558 CabSau Flower Stage 12 (FLOu0012) Vitis vinifera cDNA clone VVI190D11 5, mRNA sequence
AM475093	0.99	3821.4		1	AM436312		AM479887.2,AM478924.2,AM467655.1	>gb|DT015150.1|	VVI096H03_597768 CabSau Flower Stage 12 (FLOu0012) Vitis vinifera cDNA clone VVI096H03 5, mRNA sequence.Length=484
AM476415	0.99	3821.4		1 stop	AM444007
AM478924	0.99	3821.4		1 stop	AM445309			spliced end TPase
AM462383	0.98	3782.8			AM451412		AM486963	>gb|CB922762.1|	VVD087F07_356157 An expressed sequence tag database for abiotic stressed berries of Vitis vinifera var. Chardonnay Vitis vinifera cDNA clone VVD087F07 5, mRNA equence.Length=627
AM445309	0.97	3744.2		2 stop	AM454860
AM426642	0.96	3705.6			AM433907
AM467655	0.96	3705.6		1	AM439453
AM479887	0.96	3705.6		1	AM486963
AM433907	0.95	3667		1	AM454115
AM434365	0.95	3667			AM448768
AM451412	0.95	3667		1	AM449709
AM455882	0.94	3628.4			AM477878
AM462249	0.94	3628.4			AM455882
AM438800	0.93	3589.8			AM433286
AM477878	0.92	3551.2			AM445931
AM425148	0.91	3512.6			AM447284
AM452016	0.91	3512.6			AM478260
AM423838	0.9	3474			AM434365
AM425447	0.9	3474			AM443216
AM433286	0.9	3474			AM435297
AM434927	0.9	3474			AM455355
AM447284	0.9	3474			AM452016
AM455355	0.9	3474			AM423838
AM474543	0.9	3474			AM445734
AM487707	0.9	3474			AM456750
AM435297	0.89	3435.4			AM473946
AM442872	0.89	3435.4			AM453659
AM444875	0.89	3435.4			AM442872
AM445734	0.89	3435.4			AM446882
AM445931	0.89	3435.4			AM438800
AM446882	0.89	3435.4			AM487707
AM456750	0.89	3435.4			AM454426
AM463705	0.89	3435.4			AM463705
AM478260	0.89	3435.4			AM488606
AM443216	0.88	3396.8			AM425148
AM473946	0.88	3396.8			AM462249
AM449709	0.87	3358.2			AM474240
AM474240	0.87	3358.2			AM477475
AM433662	0.82	3165.2			AM444875
AM477475	0.82	3165.2			AM465537
AM427837	0.8	3088			AM425447
AM454426	0.8	3088			AM433662
AM465537	0.8	3088			AM451729
AM453659	0.78	3010.8			AM482140
AM423674	0.76	2933.6			AM476916
AM465057	0.76	2933.6			AM447296
AM482140	0.76	2933.6			AM465057
AM483253	0.76	2933.6			AM475079
AM467909	0.75	2895			AM480822
AM475079	0.75	2895			AM467909
AM475375	0.75	2895			AM481276
AM484499	0.75	2895			AM423674
AM488606	0.75	2895			AM462863
AM426958	0.74	2856.4			AM439535
AM447296	0.74	2856.4			AM426958
AM481276	0.74	2856.4			AM475375
AM429081	0.73	2817.8			AM429081
AM476916	0.73	2817.8			AM484499
AM442967	0.72	2779.2			AM424902
AM440378	0.71	2740.6			AM472352
AM443479	0.71	2740.6			AM488627
AM451434	0.71	2740.6			AM451434
AM462863	0.71	2740.6			AM440378
AM439535	0.7	2702			AM479143
AM453212	0.7	2702			AM442967
AM459374	0.7	2702			AM453212
AM459387	0.7	2702			AM443479
AM471878	0.7	2702			AM471878
AM479143	0.7	2702
AM451729	0.69	2663.4
AM472352	0.69	2663.4
AM480822	0.69	2663.4
AM448940	0.68	2624.8
AM429807	0.66	2547.6
AM434971	0.66	2547.6
AM469695	0.64	2470.4
AM488627	0.64	2470.4
AM465895	0.61	2354.6
AM424902	0.6	2316
AM477829	0.59	2277.4
AM478578	0.59	2277.4
AM432557	0.58	2238.8
AM485341	0.55	2123
AM464002	0.54	2084.4
AM446442	0.53	2045.8
AM478249	0.52	2007.2
AM451778	0.51	1968.6
AM459746	0.5	1930
AM434961	0.49	1891.4
AM452941	0.49	1891.4
AM487117	0.49	1891.4
AM467972	0.47	1814.2
AM487554	0.45	1737
AM474583	0.41	1582.6
AM480542	0.41	1582.6
AM423658	0.4	1544
AM478454	0.39	1505.4
AM486523	0.39	1505.4
AM437932	0.38	1466.8
AM479142	0.36	1389.6
AM481348	0.36	1389.6
AM441584	0.35	1351
AM443295	0.33	1273.8
AM465211	0.33	1273.8
AM437393	0.31	1196.6
AM472370	0.3	1158
AM484589	0.3	1158
AM438763	0.29	1119.4
AM481368	0.27	1042.2
AM478525	0.26	1003.6
AM489101	0.26	1003.6
EF141068	0.26	1003.6
AM430919	0.25	965
AM432393	0.25	965
AM456094	0.25	965
AM441198	0.24	926.4
AM481103	0.24	926.4
AM423890	0.23	887.8
AM451384	0.23	887.8
AM458233	0.23	887.8
AM465491	0.23	887.8
AM443777	0.22	849.2
AM473067	0.22	849.2
AM486298	0.22	849.2
EF141069	0.22	849.2
AM486123	0.21	810.6

[truncated: 4 more sheets: Hatvine-8, Hatvine-9, Hatvine-10, Hatvine-11]
