# Supplementary material for: Genome-Wide Analysis of the “Cut-and-Paste” Transposons of Grapevine
Source: PLoS One. 2008 Sep 3;3(9):e3107. doi: 10.1371/journal.pone.0003107 (PMC2528002; doi:10.1371/journal.pone.0003107)
Supplement: Dataset S3 — Supporting information on the Mutator superfamily (0.43 MB XLS) [file pone.0003107.s006.xls]

## Sheet: Sheet1
This dataset contains a list of sequences in which the given TEs were found.
It gives information of the putative size of the element (blasted against the full elnght representative).
Columns F-I give informaiton on the number of elements with complete (or almost complete) transposases as well as the presence of functional ORFs.
Columns K-M give information of the ESTs that hit to the TE family.

## Sheet: MUGvine-1
1806 bp of TPase				ESTs hitting:
AM430496.2				full length hits:
single copy				CF210198.1	Clone CAB20006_IIIa_Fa_C01	flower	5' read	P	Cabernet Sauvignon Flower bloom - CAB2
				CF210283.1	Clone CAB20006_IIIa_Ra_C01	flower	3' read	PA	Cabernet Sauvignon Flower bloom - CAB2
				CF210369.1	Clone CAB20006_IIa_Fa_C01	flower	5' read	P	Cabernet Sauvignon Flower bloom - CAB2
				CF210453.1	Clone CAB20006_IIa_Ra_C01	flower	3' read	A	Cabernet Sauvignon Flower bloom - CAB2
				CF211048.1	Clone CAB20007_IIa_Fa_C04	flower	5' read	P	Cabernet Sauvignon Flower bloom - CAB2
				CF404219.1	Clone CSECS023C11	fruit	3' read	PA	CabSau Berry Preveraison Stage 32 (PREu0032)
				CF405419.1	Clone CSECS053E05	fruit	3' read	PA	CabSau Berry Veraison Stage 35 (VERu0035)
				DT010926.1	Clone VVH013C07	flower	5' read	P	CabSau Flower Nectary Stage 25 (NECu0025)
				EC937688.1	Clone WIN0516_E03	mixed	3' read	P	Cab Sauv flower, leaf and root normalized (WIN05)

## Sheet: MUGvine-2
2250 bp		ESTs:
am482126.1		FC063103.1	Cabernet sauvignon	root	sT7aVVM006A14063 VVM Vitis vinifera cDNA clone VVM006A14063 5' similar to emb_CAN83921.1 hypothetical protein [Vitis vinifera]. Expect = 8e-80, mRNA sequence.Length=666
single copy		EE064909.1	Carmenere	C2B03995 Buds/little clusters (VvC2) Vitis vinifera cDNA clone C2B03995, mRNA equence.Length=772
		CB002174.1	VVB013G07_125810 An expressed sequence tag database for abiotic stressed leaves of Vitis vinifera var. Chardonnay Vitis vinifera cDNA clone VVB013G07 5, mRNA sequence.Length=696
		EC952749.1	WIN0556.C21_K15 Cab Sauv flower, leaf and root normalized (WIN05) Vitis vinifera cDNA clone WIN0556_K15 3', mRNA sequence.Length=710
		CD011721.1	VVB013G07_393049 An expressed sequence tag database for abiotic stressed leaves of Vitis vinifera var. Chardonnay Vitis vinifera cDNA clone VVB013G07 3, mRNA sequence.Length=608
		EC985433.1	berry	WIN1124.C21_N06 Muscat Hamburg pre-veraison berry normalized (WIN11) Vitis vinifera cDNA clone WIN1124_N06 3', mRNA sequence.Length=293

## Sheet: MUGvine-3
am460323.1				ESTs
there is another copy found in am472189.2 but is partial, has only 1004 bp of the last part of TPase.				FC055114.1	Cabernet Sauvignon	root	sT7aVVM_AER8H03 VVM Vitis vinifera cDNA clone VVM_AER8H03 5' similar to emb_CAN72363.1 hypothetical protein [Vitis vinifera]. Expect = 5e-47, mRNA sequence.Length=461
				CA815844.1	CA12EI301IIF_D04 Cabernet Sauvignon Leaf - CA12EI Vitis vinifera cDNA clone CA12EI301IIF_D04 5', mRNA sequence.Length=594
				EC944495.1	WIN0532.C21_A02 Cab Sauv flower, leaf and root normalized (WIN05) Vitis vinifera cDNA clone WIN0532_A02 3', mRNA sequence.Length=864
				EV240235.1	VV_PEd0011e10.g1 Vitis vinifera cv. perlette LibD Vitis vinifera cDNA, mRNA sequence.Length=1038
				EV240234.1	VV_PEd0011e10.b1 Vitis vinifera cv. perlette LibD Vitis vinifera cDNA, mRNA sequence.Length=1254
				CA817912.1	CA12EI301IIR_D04 Cabernet Sauvignon Leaf - CA12EI Vitis vinifera cDNA clone CA12EI301IIR_D04 3', mRNA sequence.Length=623
				EC958156.1	WIN064.C21_M11 Cab Sauv seed normalized (WIN06) Vitis vinifera cDNA clone WIN064_M11 3', mRNA sequence.Length=846

## Sheet: MUGvine-4
am480719.1			ESTs:
2263 bp			DT004578.1	VVG018C06_754071 CabSau Cell Culture (CELu0001) Vitis vinifera cDNA clone VVG018C06 5, mRNA sequence.Length=588
			midle of the gene
			CD012080.1	Clone VVB051E12	leaf	5' read	P	VVB018G12_393767 An expressed sequence tag database for abiotic stressed leaves of Vitis vinifera var. Chardonnay Vitis vinifera cDNA clone VVB018G12 5, mRNA sequence.
			CD005315.1	VVB051E12_325184 An expressed sequence tag database for abiotic stressed leaves of Vitis vinifera var. Chardonnay Vitis vinifera cDNA clone VVB051E12 5, mRNA sequence.Length=610
			end of the gene + 3' UTR
			CD012080.1	Clone VVB018G12	leaf	5' read	P	An expressed sequence tag database for abiotic stressed leaves of Vitis vinifera var. Chardonnay
			CF210064.1	Clone CAB20005_Ia_Fa_E02	flower	5' read	P	Cabernet Sauvignon Flower bloom - CAB2
			CF210137.1	Clone CAB20005_Ia_Ra_E02	flower	3' read	PA	Cabernet Sauvignon Flower bloom - CAB2
			EC966235.1	Clone WIN0820_G22	other	3' read	P	Cab Sauv seed normalized (WIN08)

## Sheet: MUGvine-5
1749 bp	am460323.1		shotgun	ESTs
1100 bp	am472189.1		am460323.1	FC055114.1	sT7aVVM_AER8H03 VVM Vitis vinifera cDNA clone VVM_AER8H03 5' similar to emb_CAN72363.1 hypothetical protein [Vitis vinifera]. Length=461
				ending of the gene, including the 3' UTR.
			am460323.1	CA817912.1	Clone CA12EI301IIR_D04	leaf	3' read	A	Cabernet Sauvignon Leaf - CA12EI
			am460323.1	EC944495.1	Clone WIN0532_A02	mixed	3' read	P	WIN0532.C21_A02 Cab Sauv flower, leaf and root normalized (WIN05) Vitis vinifera cDNA clone WIN0532_A02 3', mRNA sequence.Length=864
			am472189.1	EC958156.1	Clone WIN064_M11	other	3' read	A	Cab Sauv seed normalized (WIN06)
			am460323.1	EV240234.1		bud	1254 bp	cv. Perlette	WARNING: Possible contamination with vector, linker, or primer
			am460323.1	EV240235.1		bud	1038 bp	cv. Perlette	WARNING: Possible contamination with vector, linker, or primer

## Sheet: MUGvine-6
1 TPase copy	2.5 kb			ESTs:
				BQ794929.1	Clone TT284H07	fruit	3' read	A	Shiraz	Veraison Grape berries Lambda Zap II Library
Am459930.1				CF371798.1	Clone CSECS009H05	inflorescence	3' read	A	CabSau Flower Stage 7 (FLOu0007)
				CX017549.1	Clone 3596_UB_S11_B03	fruit		P	Wild type Ugni blanc SSH Library
				CX017846.1	Clone 3596_UB_S6_G03	fruit		P	Wild type Ugni blanc SSH Library
				DV939819.1	Clone CSECS171B08	fruit	3' read	A	CabSau Berry Postveraison Stage 38 (POSu0038)
				EC940176.1	Clone WIN0518_N18	mixed	3' read	A	Cab Sauv flower, leaf and root normalized (WIN05)
				EC943964.1	Clone WIN0530_G15	mixed	3' read	A	Cab Sauv flower, leaf and root normalized (WIN05)
				EE092569.1	Clone S7B03621	fruit		P	Thompson-seedless		berry

## Sheet: MUGvine-7
2340 bp TPase				ESTs
am461949.2				DT013736.1	VVH004E12_738915 CabSau Flower Nectary Stage 25 (NECu0025) Vitis vinifera cDNA clone VVH004E12 5, mRNA sequence.Length=564
				DY474418.1	CSECS210D04_5_PREn0028 CabSau Normalised Berry Fruit Set Stage 28 (PREn0028) Vitis vinifera cDNA clone CSECS210D04 5', mRNA sequence.Length=329
				DV941138.1	CSECS210D04_PREn0028 CabSau Normalised Berry Fruit Set Stage 28 (PREn0028) Vitis vinifera cDNA clone CSECS210D04 3', mRNA sequence.Length=329
				these are at the end of the gene and all have a spliced 3' UTR
				CB910257.1	Clone VVD176A03	fruit	5' read		An expressed sequence tag database for abiotic stressed berries of Vitis vinifera var. Chardonnay
				CB920113.1	Clone VVD059D12	fruit	5' read		An expressed sequence tag database for abiotic stressed berries of Vitis vinifera var. Chardonnay
				EC925839.1	Clone WIN0210_D02	mixed	3' read	P	Cab Sauv flower, leaf and root non-normalized (WIN02)

## Sheet: MUGvine-8
2949				ESTs
				CF209346.1	Clone CAB20004_IVb_Rb_G05	flower	3' read	PA	Cabernet Sauvignon Flower bloom - CAB2
am425404.1				CF516577.1	Clone CAP0003_IIR_G06	leaf	3' read	A	Vitis vinifera cv. cabernet sauvignon (Clone 8) Petiole - CAP
				EE079804.1	Clone S2B23339	bud		P	Thompson-seedless
				CF209266.1	Clone CAB20004_IVb_Fa_G05	flower	5' read	P	Cabernet Sauvignon Flower bloom - CAB2
				CF516248.1	Clone CAP0003_IIF_G06	leaf	5' read	PA	Vitis vinifera cv. cabernet sauvignon (Clone 8) Petiole - CAP

## Sheet: Mutavine-1
accession	querry coverage	coverage	max indentity			mudravi1 has a 3' region of TPase that no others have. I omitted this piece for TPase coverage blast.
AM455875.1	0.94	16659.6	1			sequences having lesst than 80% similarity with mudravi TPase were omitted for TPase coverage blast
AM475358.2	0.79	14001.2	1			>90% TPase
AM487106.1	0.74	13115	1		good ORF	accession	querry coverage	max identity
AM457761.2	0.73	12937.8	0.87			AM455875.1	1	1			ESTs hitting TPase
AM486136.1	0.71	12583.3	0.88		1	AM475358.2	1	0.99		shotgun source	non-spliced full length ESTs hitting the beginnng of TPase, including 5' UTR
AM458732.2	0.69	12228.9	1			AM465286.1	1	0.99		AM425474.2	CD713196.1	Clone VVB187C08	leaf	5' read	P	An expressed sequence tag database for abiotic stressed leaves of Vitis vinifera var. Chardonnay
AM467695.2	0.65	11520	0.9			AM452185.2	1	0.99		AM425474.2,AM438978.2,AM480497.1	CD715046.1	Clone VVB207F01	leaf	5' read	P	An expressed sequence tag database for abiotic stressed leaves of Vitis vinifera var. Chardonnay
AM428717.2	0.59	10456.6	0.88		1	AM446457.2	1	0.98		AM425474.2,AM438978.2,AM480497.1	CD717162.1	Clone VVB136C07	leaf	5' read	P	An expressed sequence tag database for abiotic stressed leaves of Vitis vinifera var. Chardonnay
AM447723.2	0.58	10279.3	1		1	AM437443.2	1	0.98		AM425474.2,AM438978.2,AM480497.1	CD719015.1	Clone VVB156F03	leaf	5' read	P	An expressed sequence tag database for abiotic stressed leaves of Vitis vinifera var. Chardonnay
AM448431.2	0.57	10102.1	0.91			AM462131.1	1	0.96		AM425474.2	CD720189.1	Clone VVB169E04	leaf	5' read	P	An expressed sequence tag database for abiotic stressed leaves of Vitis vinifera var. Chardonnay
AM467642.2	0.56	9924.88	0.9		1	AM458441.2	1	0.96
AM462131.1	0.55	9747.65	0.97			AM451171.1	1	0.96
AM451171.1	0.55	9747.65	1		1	AM445602.1	1	0.95
AM473774.1	0.54	9570.42	0.92			AM440807.1	1	0.9
AM437443.2	0.54	9570.42	0.98			AM430608.2	1	0.9
AM445602.1	0.54	9570.42	0.95			AM432005.2	1	0.9
AM458441.2	0.54	9570.42	0.95			AM487106.1	1	0.9
AM478509.2	0.52	9215.96	0.9			AM471331.2	1	0.9
AM446457.2	0.5	8861.5	1			AM447334.2	1	0.9
AM464936.2	0.49	8684.27	0.9			AM433489.1	1	0.9
AM454199.2	0.49	8684.27	0.96			AM467642.2	1	0.9
AM465286.1	0.47	8329.81	0.98			AM486136.1	1	0.89
AM429228.1	0.45	7975.35	0.94			AM467695.2	1	0.89
AM440807.1	0.43	7620.89	0.94		1	AM464936.2	1	0.89
AM463020.2	0.43	7620.89	1			AM473774.1	1	0.89
AM469163.1	0.4	7089.2	0.86			AM448431.2	1	0.89
AM468004.2	0.39	6911.97	1			AM457761.2	1	0.88
AM447334.2	0.38	6734.74	0.95			AM458955.1	1	0.85
AM480497.1	0.38	6734.74	1		1	AM487398.2	1	0.85
AM430608.2	0.38	6734.74	0.89		1	AM463020.2	1	0.85
AM483185.2	0.38	6734.74	0.86		1	AM438978.2	1	0.85
AM458955.1	0.37	6557.51	1			AM480497.1	1	0.85
AM463170.1	0.37	6557.51	0.87			AM442776.1	1	0.85
AM425474.2	0.36	6380.28	1		1	AM425474.2	1	0.85
AM452185.2	0.34	6025.82	0.97		1	AM482248.2	1	0.85
AM475229.1	0.34	6025.82	0.85			AM481244.2	1	0.85
AM464344.1	0.33	5848.59	0.87			AM436672.2	1	0.85
AM436672.2	0.33	5848.59	0.84			AM426362.2	1	0.84
AM433489.1	0.33	5848.59	0.95			AM463170.1	1	0.84
AM469051.2	0.32	5671.36	0.89			AM468463.2	1	0.84
AM480852.2	0.32	5671.36	0.91			AM471523.2	1	0.84
AM441095.2	0.32	5671.36	0.94			AM439494.2	1	0.84
AM449608.1	0.31	5494.13	0.92			AM464344.1	1	0.82
AM479396.2	0.31	5494.13	1			AM432027.1	1	0.82
AM432756.1	0.31	5494.13	0.95			AM469051.2	0.99	0.89
AM464490.2	0.31	5494.13	0.94			AM480857.2	0.99	0.87
AM488692.2	0.3	5316.9	1			AM477726.2	0.99	0.87
AM432005.2	0.29	5139.67	0.94			AM469163.1	0.99	0.87
AM447664.1	0.29	5139.67	0.94			AM442679.1	0.99	0.83
AM444293.2	0.29	5139.67	0.94			AM475314.2	0.99	0.83
AM446113.1	0.29	5139.67	0.88			AM463423.2	0.99	0.83
AM471523.2	0.28	4962.44	0.89			AM479137.2	0.99	0.83
AM478616.2	0.28	4962.44	0.88			AM479944.2	0.99	0.81
AM444300.2	0.27	4785.21	0.93			AM447664.1	0.97	0.86
AM425122.2	0.27	4785.21	0.89			AM449608.1	0.97	0.85
AM429027.2	0.27	4785.21	0.96		1	AM450090.2	0.97	0.85
AM428601.2	0.27	4785.21	0.84			AM440900.2	0.97	0.8
AM487398.2	0.25	4430.75	1			AM428717.2	0.95	0.89
AM482248.2	0.25	4430.75	1			AM475229.1	0.93	0.83
AM449154.1	0.25	4430.75	1
AM464960.2	0.25	4430.75	0.95
AM465943.2	0.25	4430.75	0.86
AM438978.2	0.24	4253.52	1
AM432027.1	0.24	4253.52	0.92
AM471331.2	0.24	4253.52	0.91
AM477374.2	0.24	4253.52	0.85
AM475782.1	0.24	4253.52	0.94
AM475922.1	0.23	4076.29	0.92
AM448860.2	0.23	4076.29	1
AM486139.1	0.23	4076.29	1
AM442679.1	0.22	3899.06	0.92
AM439954.1	0.22	3899.06	0.87
AM480523.2	0.22	3899.06	0.94
AM436934.2	0.21	3721.83	0.84
AM484884.2	0.21	3721.83	0.96
AM438489.2	0.21	3721.83	1
AM465296.2	0.21	3721.83	0.88
AM462320.2	0.21	3721.83	0.83
AM444160.2	0.21	3721.83	0.92
AM464473.2	0.21	3721.83	0.95
AM478198.2	0.21	3721.83	0.94
AM467360.2	0.21	3721.83	1

[truncated: 22 more sheets: Mutavine-3, Mutavine-4, Mutavine-5, Mutavine-6, Mutavine-7, Mutavine-8, Mutavine-9, Mutavine-10, Mutavine-11, Mutavine-12, Mutavine-13, Mutavine-14, Mut-17_MUDRAVI2, Mutavine-15, Mutavine-16, Mutavine-17, Mutavine-18, Hopvine-1, Hopvine-2, Jitvine-1 …]
