# Supplementary material for: Genome-Wide Analysis of the “Cut-and-Paste” Transposons of Grapevine
Source: PLoS One. 2008 Sep 3;3(9):e3107. doi: 10.1371/journal.pone.0003107 (PMC2528002; doi:10.1371/journal.pone.0003107)
Supplement: Dataset S4 — Supporting information on the PIF superfamily (0.22 MB XLS) [file pone.0003107.s007.xls]

## Sheet: Info
This dataset contains a list of sequences in which the given TEs were found.
It gives information of the putative size of the element (blasted against the full elnght representative).
Columns E-H give informaiton on the number of elements with complete (or almost complete) transposases as well as the presence of functional ORFs.
Columns J-M give information of the ESTs that hit to the TE family.

## Sheet: Pifvine-1
accession	query coverage	bp			>90% TPase+ORF1 (>80% similar)				shotgun	ESTs
AM475059.2	0.98	5692.82		good ORF	accession	querry coverage	max identity			1 EST hits to ORF1 region:
AM432888.2	0.97	5634.73			AM427240	0.96	0.87		AM469990	CB920937.1	An expressed sequence tag database for abiotic stressed berries of Vitis vinifera var. Chardonnay
AM471157.2	0.97	5634.73			AM432888	1	0.94
AM439375.2	0.96	5576.64		1	AM439375	0.95	0.97			no hits to TPase
AM462882.1	0.76	4414.84			AM450166	0.96	0.93
AM487778.1	0.72	4182.48			AM461042	0.94	0.85
AM465076.1	0.62	3601.58		1	AM462882	0.95	0.96
AM485947.2	0.61	3543.49			AM465076	0.95	0.91
AM461145.2	0.55	3194.95			AM468260	0.93	0.89
AM427240.2	0.54	3136.86		1	AM471157	0.95	0.96
AM461042.2	0.54	3136.86			AM475059	0.99	0.94
AM450166.2	0.53	3078.77			AM485947	0.94	0.89
AM450720.1	0.51	2962.59		1	AM487778	0.95	0.97
AM455198.2	0.47	2730.23
AM434074.1	0.47	2730.23
AM454615.1	0.46	2672.14
AM468260.2	0.45	2614.05
AM483757.2	0.44	2555.96
AM433261.2	0.44	2555.96
AM465766.1	0.43	2497.87
AM488238.2	0.43	2497.87
AM456457.2	0.42	2439.78
AM434655.1	0.41	2381.69
AM447304.2	0.41	2381.69
AM429651.2	0.41	2381.69
AM425706.1	0.4	2323.6
AM477236.2	0.4	2323.6
AM476720.2	0.39	2265.51
AM432977.2	0.38	2207.42
AM469990.2	0.38	2207.42
AM426836.2	0.37	2149.33
AM428974.2	0.36	2091.24
AM472440.1	0.35	2033.15
AM464087.1	0.35	2033.15
AM455723.1	0.33	1916.97
AM438365.2	0.31	1800.79
AM484047.2	0.29	1684.61
AM423336.2	0.28	1626.52
AM434196.2	0.28	1626.52
AM437519.1	0.27	1568.43
AM444761.2	0.27	1568.43
AM452113.2	0.26	1510.34
AM479060.1	0.26	1510.34
AM455399.2	0.25	1452.25
AM450502.1	0.24	1394.16
AM444937.2	0.24	1394.16
AM486900.2	0.24	1394.16
AM435517.1	0.24	1394.16
AM458933.2	0.24	1394.16
AM435935.2	0.23	1336.07
AM436875.2	0.23	1336.07
AM457332.1	0.22	1277.98
AM454958.2	0.21	1219.89
AM430967.2	0.21	1219.89

## Sheet: Pifvine-2
accession	query coverage	max identity	coverage bp				>90% TPase					shotguns	ESTs hitting ORFs:
AM426600.2	0.99	0.96	6721.11		good ORF1	good TPase	accession	qerry coverage	max similarity			AM438849	>gb|BQ800595.1|	Ugni Blanc	EST 7630 Veraison Grape berries SuperScriptTM Plasmid Library Vitis vinifera cDNA clone PT011B02 3', mRNA sequence.
AM469438.1	0.98	0.96	6653.22				AM424403	0.93	0.95			AM487626	>gb|CD011962.1|	VVB004D04_393531 An expressed sequence tag database for abiotic stressed leaves of Vitis vinifera var. Chardonnay Vitis vinifera
AM449440.2	0.96	0.97	6517.44		1	1	AM426600	1	0.99				>gb|EV237767.1|	VV_PEc04F11.r.ab1 Vitis vinifera cv. perlette LibC Vitis vinifera cDNA, mRNA sequence.
AM467691.1	0.9	0.95	6110.1		1		AM434197	1	0.93				>gb|EV237766.1|	VV_PEc04F11.f.ab1 Vitis vinifera cv. perlette LibC Vitis vinifera cDNA, mRNA sequence.
AM486626.2	0.67	0.97	4548.63		1 stop	1	AM434965	1	0.98
AM438849.2	0.66	0.96	4480.74				AM438367	1	0.96
AM448944.1	0.64	0.97	4344.96		1		AM438849	1	0.95				EST hitting MITEs:
AM487944.1	0.56	0.96	3801.84				AM448944	1	0.96			AM467559.2	EC963842.1	WIN086.C21_I07 Cab Sauv seed normalized (WIN08) Vitis vinifera cDNA clone WIN086_I07 3', mRNA sequence.Length=431
AM477927.1	0.55	0.97	3733.95		1 stop	1	AM449440	1	0.98			AM467559.2	CB975502.1	CAB30007_IIb_Fa_H11 Cabernet Sauvignon Berry Stage I - CAB3 Vitis vinifera cDNA clone CAB30007_IIb_Fa_H11 5', mRNA sequence.Length=671
AM438367.2	0.54	0.97	3666.06			1	AM452166	1	0.95			am433436.2	CB975568.1	WIN0535.C21_J17 Cab Sauv flower, leaf and root normalized (WIN05) Vitis vinifera cDNA clone WIN0535_J17 3', mRNA sequence.Length=785
AM462244.2	0.53	0.97	3598.17				AM455079	0.99	0.95			am453178.1	EC945718.1	WIN0526.C21_P12 Cab Sauv flower, leaf and root normalized (WIN05) Vitis vinifera cDNA clone WIN0526_P12 3', mRNA sequence
AM452166.1	0.52	0.96	3530.28				AM462244	1	0.95			am453178.1	EC942828.1	VVA019A08_54307 An expressed sequence tag database for abiotic tressed leaves of Vitis vinifera var. Chardonnay Vitis vinifera cDNA clone VVA019A08 5, mRNA sequence
AM455079.2	0.52	0.96	3530.28		1	1	AM469438	1	1			am453178.1	BM437406.1	VVA019A08_402649 An expressed sequence tag database for abiotic stressed leaves of Vitis vinifera var. Chardonnay Vitis vinifera cDNA clone VVA019A08 3, mRNA sequence
AM427808.2	0.51	0.94	3462.39		1 stop	1 stop	AM480273	0.98	0.95			am453178.1	CD711060.1	VVA019A08_402175 An expressed sequence tag database for abiotic stressed leaves of Vitis vinifera var. Chardonnay Vitis vinifera cDNA clone VVA019A08 5, mRNA sequence
AM480273.2	0.5	0.96	3394.5		1 stop	1 stop	AM486626	1	0.97			am453178.1	CD710823.1	WIN014.BR_J07 Cab Sauv pericarp non-normalized (WIN01) Vitis vinifera cDNA clone WIN014_J07 5', mRNA sequence
AM424403.2	0.49	1	3326.61				AM487944	1	0.94			am453178.1	EC920537.1	WIN014.B21_J07 Cab Sauv pericarp non-normalized (WIN01) Vitis vinifera cDNA clone WIN014_J07 3', mRNA sequence
AM434197.2	0.46	0.94	3122.94									am453178.1	EC921778.1	WIN0560.C21_J16 Cab Sauv flower, leaf and root normalized (WIN05) Vitis vinifera cDNA clone WIN0560_J16 3', mRNA sequence
AM453140.2	0.45	0.94	3055.05									am453178.1	EC954072.1	WIN0560.C21_J16 Cab Sauv flower, leaf and root normalized (WIN05) Vitis vinifera cDNA clone WIN0560_J16 3
AM487626.2	0.44	1	2987.16
AM447691.1	0.43	0.97	2919.27
AM423396.2	0.42	0.95	2851.38
AM449677.2	0.41	0.84	2783.49
AM434965.1	0.39	0.98	2647.71
AM433092.2	0.38	0.94	2579.82
AM442964.2	0.34	0.96	2308.26
AM450505.1	0.34	0.81	2308.26
AM465310.2	0.33	0.89	2240.37
AM459339.1	0.32	0.93	2172.48
AM431127.2	0.31	0.93	2104.59
AM433810.2	0.3	0.92	2036.7
AM440211.2	0.28	0.9	1900.92
AM476800.2	0.26	0.96	1765.14
AM429631.2	0.26	0.96	1765.14
AM429323.2	0.25	1	1697.25
AM473474.2	0.25	0.96	1697.25
AM439013.2	0.24	0.92	1629.36
AM428371.2	0.23	0.97	1561.47
AM426245.2	0.21	0.98	1425.69
AM440629.1	0.2	0.99	1357.8
AM462850.2	0.2	0.98	1357.8
AM440807.1	0.19	0.97	1289.91
AM452761.2	0.19	0.95	1289.91
AM443383.1	0.19	0.94	1289.91
AM439123.2	0.19	0.88	1289.91
AM445637.2	0.18	0.95	1222.02
AM452413.1	0.18	0.72	1222.02
AM445144.1	0.16	0.96	1086.24
AM460034.2	0.16	0.95	1086.24
AM453178.1	0.15	1	1018.35
AM468638.1	0.15	1	1018.35
AM437669.2	0.15	0.96	1018.35
AM468475.1	0.15	0.96	1018.35
AM469506.2	0.14	0.96	950.46
AM435983.1	0.13	0.98	882.57
AM487854.2	0.13	0.96	882.57
AM467133.2	0.13	0.96	882.57
AM423627.2	0.12	0.95	814.68
AM463765.1	0.12	0.82	814.68
AM439216.1	0.11	0.96	746.79
AM444176.1	0.11	0.96	746.79
AM423509.2	0.11	0.93	746.79
AM474763.1	0.11	0.93	746.79
AM426221.2	0.11	0.91	746.79
AM477983.2	0.11	0.88	746.79
AM481271.2	0.1	1	678.9
AM437964.1	0.1	0.96	678.9
AM459397.2	0.1	0.96	678.9
AM466359.2	0.1	0.95	678.9
AM431055.2	0.1	0.95	678.9
AM445491.2	0.1	0.94	678.9
AM438549.1	0.1	0.93	678.9
AM469497.2	0.1	0.9	678.9
AM444628.2	0.1	0.89	678.9
AM452314.2	0.1	0.76	678.9
AM427038.2	0.09	1	611.01
AM465240.1	0.09	1	611.01
AM459752.1	0.09	0.98	611.01
AM478654.2	0.09	0.95	611.01
AM433472.2	0.09	0.95	611.01
AM432926.2	0.09	0.94	611.01
AM483370.2	0.09	0.94	611.01
AM477430.2	0.09	0.92	611.01
AM432699.2	0.09	0.92	611.01
AM433362.2	0.09	0.91	611.01
AM462943.1	0.09	0.89	611.01
AM455480.1	0.09	0.89	611.01
AM426746.2	0.09	0.88	611.01
AM453212.2	0.09	0.88	611.01
AM487656.2	0.09	0.85	611.01
AM429887.2	0.09	0.83	611.01
AM434372.1	0.09	0.8	611.01
AM457917.2	0.09	0.77	611.01
AM468036.2	0.08	1	543.12
AM438622.2	0.08	0.97	543.12
AM451050.2	0.08	0.93	543.12
AM462650.2	0.08	0.93	543.12
AM448522.1	0.08	0.92	543.12
AM479306.1	0.08	0.92	543.12
AM459143.2	0.08	0.91	543.12
AM439808.2	0.08	0.91	543.12
AM445524.1	0.08	0.9	543.12
AM469412.2	0.08	0.89	543.12
AM442314.2	0.08	0.88	543.12
AM464192.1	0.08	0.88	543.12
AM461917.2	0.08	0.84	543.12
AM436040.2	0.08	0.83	543.12
AM487883.2	0.08	0.76	543.12
AM436343.2	0.07	1	475.23
AM470785.2	0.07	1	475.23
AM456995.2	0.07	0.96	475.23
AM455085.2	0.07	0.96	475.23
AM438353.2	0.07	0.96	475.23
AM425234.2	0.07	0.96	475.23
AM447938.2	0.07	0.93	475.23
AM439535.1	0.07	0.92	475.23
AM461823.2	0.07	0.92	475.23
AM476559.2	0.07	0.91	475.23
AM455445.2	0.07	0.9	475.23
AM466683.2	0.07	0.88	475.23
AM450556.2	0.07	0.88	475.23
AM478941.2	0.07	0.88	475.23
AM477291.2	0.07	0.88	475.23
AM438933.2	0.07	0.88	475.23
AM458542.1	0.07	0.87	475.23
AM484644.2	0.07	0.87	475.23
AM482446.1	0.07	0.87	475.23
AM425974.1	0.07	0.87	475.23
AM448399.2	0.07	0.86	475.23
AM466316.2	0.07	0.85	475.23
AM463018.2	0.07	0.85	475.23
AM433145.2	0.07	0.85	475.23
AM463576.2	0.07	0.84	475.23
AM436772.2	0.07	0.81	475.23
AM476929.2	0.07	0.8	475.23
AM477164.2	0.07	0.8	475.23
AM424127.2	0.06	1	407.34
AM479677.2	0.06	0.95	407.34
AM481178.2	0.06	0.92	407.34
AM479779.2	0.06	0.92	407.34
AM450817.2	0.06	0.91	407.34
AM482540.2	0.06	0.91	407.34
AM453785.2	0.06	0.9	407.34
AM426982.2	0.06	0.89	407.34
AM487686.1	0.06	0.89	407.34
AM439700.2	0.06	0.89	407.34
AM452748.2	0.06	0.88	407.34
AM439532.2	0.06	0.88	407.34
AM431727.2	0.06	0.88	407.34
AM434305.2	0.06	0.88	407.34
AM434062.2	0.06	0.88	407.34
AM468301.2	0.06	0.88	407.34
AM447383.2	0.06	0.88	407.34
AM482195.1	0.06	0.87	407.34
AM460350.2	0.06	0.87	407.34
AM436922.2	0.06	0.87	407.34
AM432526.2	0.06	0.86	407.34
AM455577.2	0.06	0.86	407.34
AM453979.1	0.06	0.86	407.34
AM452100.2	0.06	0.86	407.34
AM449479.2	0.06	0.85	407.34
AM468281.2	0.06	0.85	407.34
AM451908.2	0.06	0.85	407.34
AM435020.2	0.06	0.85	407.34
AM467559.2	0.06	0.84	407.34
AM430253.2	0.06	0.84	407.34
AM442643.2	0.06	0.84	407.34
AM433436.2	0.06	0.84	407.34
AM431974.2	0.06	0.83	407.34
AM464676.2	0.06	0.82	407.34
AM438187.1	0.06	0.82	407.34
AM466345.2	0.06	0.81	407.34
AM430745.1	0.06	0.78	407.34
AM445562.2	0.06	0.77	407.34
AM425586.2	0.06	0.76	407.34
AM447411.1	0.06	0.76	407.34
AM433573.2	0.06	0.76	407.34
AM442908.2	0.06	0.75	407.34
AM469597.2	0.06	0.75	407.34
AM486160.2	0.06	0.75	407.34
AM462760.1	0.06	0.74	407.34
AM465450.2	0.06	0.74	407.34
AM451046.2	0.06	0.74	407.34
AM480012.1	0.06	0.73	407.34
AM463535.2	0.06	0.72	407.34
AM432225.2	0.06	0.72	407.34
AM437984.2	0.06	0.72	407.34
AM430072.1	0.06	0.7	407.34
AM482762.2	0.06	0.67	407.34
AM450109.2	0.05	0.96	339.45
AM461336.2	0.05	0.96	339.45
AM438314.2	0.05	0.95	339.45
AM482758.2	0.05	0.91	339.45
AM466306.2	0.05	0.9	339.45
AM458677.2	0.05	0.89	339.45
AM483073.2	0.05	0.89	339.45
AM480655.2	0.05	0.89	339.45
AM437104.1	0.05	0.89	339.45
AM426256.2	0.05	0.88	339.45
AM469767.2	0.05	0.88	339.45
AM466283.1	0.05	0.87	339.45
AM472522.2	0.05	0.87	339.45
AM479462.2	0.05	0.87	339.45
AM483919.2	0.05	0.87	339.45
AM444279.1	0.05	0.85	339.45
AM486623.2	0.05	0.85	339.45
AM436880.1	0.05	0.81	339.45
AM456103.1	0.05	0.81	339.45
AM431601.2	0.05	0.8	339.45
AM455253.1	0.05	0.77	339.45
AM475279.2	0.05	0.73	339.45
AM427699.2	0.05	0.7	339.45
AM464719.2	0.05	0.69	339.45
AM482229.2	0.05	0.68	339.45
AM444930.2	0.05	0.68	339.45
AM457591.2	0.05	0.68	339.45
AM461257.2	0.05	0.68	339.45
AM475932.2	0.05	0.67	339.45
AM483093.2	0.05	0.67	339.45
AM458794.2	0.05	0.67	339.45
AM458144.2	0.05	0.67	339.45
AM458991.2	0.05	0.64	339.45
AM453331.2	0.04	1	271.56
AM446370.2	0.04	1	271.56
AM433392.2	0.04	0.98	271.56
AM431642.2	0.04	0.95	271.56
AM436099.1	0.04	0.94	271.56
AM481480.2	0.04	0.93	271.56
AM485516.2	0.04	0.93	271.56
AM485414.1	0.04	0.93	271.56
AM433461.2	0.04	0.92	271.56
AM446442.1	0.04	0.91	271.56
AM424706.2	0.04	0.91	271.56
AM425144.2	0.04	0.9	271.56
AM443783.1	0.04	0.89	271.56
AM465220.2	0.04	0.89	271.56
AM436818.2	0.04	0.88	271.56
AM441578.2	0.04	0.88	271.56
AM443676.2	0.04	0.85	271.56
AM452710.2	0.04	0.84	271.56
AM470860.1	0.04	0.84	271.56
AM430866.2	0.04	0.81	271.56
AM429716.2	0.04	0.8	271.56
AM484733.2	0.04	0.8	271.56
AM456584.1	0.04	0.8	271.56
AM447150.1	0.04	0.8	271.56
AM485595.1	0.04	0.78	271.56
AM488816.2	0.04	0.78	271.56
AM423957.2	0.04	0.77	271.56
AM485169.2	0.04	0.77	271.56
AM486436.2	0.04	0.77	271.56
AM449212.2	0.04	0.77	271.56
AM431355.2	0.04	0.76	271.56
AM452679.1	0.04	0.76	271.56
AM477970.2	0.04	0.76	271.56
AM433551.2	0.04	0.75	271.56
AM435361.2	0.04	0.75	271.56
AM458229.1	0.04	0.68	271.56
AM426814.2	0.03	1	203.67
AM458867.2	0.03	1	203.67
AM450000.2	0.03	0.95	203.67
AM471008.2	0.03	0.94	203.67
AM446487.2	0.03	0.93	203.67
AM448959.2	0.03	0.93	203.67
AM456479.2	0.03	0.93	203.67
AM466554.2	0.03	0.92	203.67
AM453720.1	0.03	0.92	203.67
AM451743.2	0.03	0.91	203.67
AM458842.2	0.03	0.91	203.67
AM487326.1	0.03	0.9	203.67
AM429550.2	0.03	0.9	203.67
AM469888.2	0.03	0.89	203.67
AM476528.2	0.03	0.89	203.67
AM457765.2	0.03	0.89	203.67
AM472223.2	0.03	0.89	203.67
AM431320.2	0.03	0.89	203.67
AM477104.2	0.03	0.89	203.67
AM441680.2	0.03	0.88	203.67
AM466583.2	0.03	0.88	203.67
AM475265.1	0.03	0.87	203.67
AM452810.2	0.03	0.87	203.67
AM463742.2	0.03	0.87	203.67
AM456128.2	0.03	0.87	203.67
AM440084.2	0.03	0.87	203.67
AM449279.1	0.03	0.86	203.67
AM450477.2	0.03	0.86	203.67
AM444041.2	0.03	0.86	203.67
AM435664.2	0.03	0.86	203.67
AM488916.2	0.03	0.86	203.67
AM440910.2	0.03	0.86	203.67
AM477952.1	0.03	0.86	203.67
AM471981.1	0.03	0.86	203.67
AM426629.2	0.03	0.85	203.67
AM477595.1	0.03	0.85	203.67
AM471850.1	0.03	0.85	203.67
AM483874.2	0.03	0.84	203.67
AM424297.2	0.03	0.84	203.67
AM451154.2	0.03	0.84	203.67
AM439949.1	0.03	0.84	203.67
AM449059.1	0.03	0.84	203.67
AM463399.2	0.03	0.84	203.67
AM471223.1	0.03	0.84	203.67
AM479383.1	0.03	0.84	203.67
AM455501.2	0.03	0.84	203.67
AM475881.2	0.03	0.83	203.67
AM427095.2	0.03	0.83	203.67
AM442348.1	0.03	0.83	203.67
AM484903.2	0.03	0.83	203.67
AM430235.2	0.03	0.83	203.67
AM462013.2	0.03	0.83	203.67
AM482681.2	0.03	0.82	203.67
AM469988.2	0.03	0.82	203.67
AM434845.2	0.03	0.82	203.67
AM446230.2	0.03	0.82	203.67
AM479280.2	0.03	0.82	203.67
AM435097.2	0.03	0.82	203.67
AM434095.2	0.03	0.82	203.67
AM479507.2	0.03	0.82	203.67
AM484789.2	0.03	0.82	203.67
AM431021.2	0.03	0.82	203.67
AM483196.2	0.03	0.82	203.67
AM480755.1	0.03	0.82	203.67
AM468877.2	0.03	0.81	203.67
AM484246.2	0.03	0.81	203.67
AM427854.2	0.03	0.81	203.67
AM472885.2	0.03	0.81	203.67
AM461988.2	0.03	0.81	203.67
AM454958.2	0.03	0.81	203.67
AM484621.2	0.03	0.8	203.67
AM444759.2	0.03	0.8	203.67
AM447904.1	0.03	0.8	203.67
AM475672.2	0.03	0.8	203.67
AM444097.2	0.03	0.8	203.67
AM469896.2	0.03	0.8	203.67
AM463590.2	0.03	0.79	203.67
AM444797.1	0.03	0.79	203.67
AM470198.2	0.03	0.79	203.67
AM431080.2	0.03	0.79	203.67
AM449954.1	0.03	0.79	203.67
AM426479.1	0.03	0.79	203.67
AM443051.2	0.03	0.78	203.67
AM460298.1	0.03	0.78	203.67
AM427291.2	0.03	0.78	203.67
AM438916.1	0.03	0.78	203.67
AM456904.2	0.03	0.78	203.67
AM440665.2	0.03	0.77	203.67
AM485450.2	0.03	0.77	203.67
AM425581.2	0.03	0.77	203.67
AM483439.2	0.03	0.77	203.67
AM442609.2	0.03	0.77	203.67
AM430898.2	0.03	0.76	203.67
AM463215.2	0.03	0.76	203.67
AM455872.2	0.03	0.76	203.67
AM433343.2	0.03	0.76	203.67
AM439445.2	0.03	0.76	203.67
AM445784.1	0.03	0.76	203.67
AM470959.2	0.03	0.76	203.67
AM449572.2	0.03	0.76	203.67
AM482639.2	0.03	0.75	203.67
AM488651.2	0.03	0.74	203.67
AM459270.2	0.03	0.72	203.67
AM486821.2	0.03	0.72	203.67
AM428671.2	0.03	0.71	203.67
AM489354.1	0.03	0.7	203.67
AM435791.2	0.03	0.67	203.67
AM484047.2	0.03	0.66	203.67
AM479060.1	0.03	0.66	203.67
AM471414.2	0.03	0.66	203.67
AM465766.1	0.03	0.64	203.67
AM447476.2	0.02	1	135.78
AM449922.2	0.02	1	135.78
AM467534.1	0.02	1	135.78
AM441327.2	0.02	0.95	135.78
AM446928.2	0.02	0.95	135.78
AM451000.2	0.02	0.94	135.78
AM439328.2	0.02	0.94	135.78
AM450289.2	0.02	0.93	135.78
AM426498.2	0.02	0.93	135.78
AM426309.2	0.02	0.93	135.78
AM460878.2	0.02	0.93	135.78
AM458981.1	0.02	0.93	135.78
AM483369.1	0.02	0.92	135.78
AM462014.1	0.02	0.92	135.78
AM472816.2	0.02	0.92	135.78
AM450097.1	0.02	0.92	135.78
AM425335.1	0.02	0.92	135.78
AM476997.1	0.02	0.92	135.78
AM479253.1	0.02	0.92	135.78
AM487086.2	0.02	0.92	135.78
AM446537.2	0.02	0.92	135.78
AM477298.1	0.02	0.92	135.78
AM464667.1	0.02	0.91	135.78
AM467500.2	0.02	0.91	135.78
AM428651.2	0.02	0.91	135.78
AM455262.2	0.02	0.91	135.78
AM487867.1	0.02	0.91	135.78
AM452770.2	0.02	0.91	135.78
AM480066.2	0.02	0.9	135.78
AM465931.2	0.02	0.9	135.78
AM468510.2	0.02	0.9	135.78
AM480238.1	0.02	0.9	135.78
AM435406.2	0.02	0.9	135.78
AM441995.2	0.02	0.9	135.78
AM456816.1	0.02	0.89	135.78
AM448952.2	0.02	0.89	135.78
AM442984.2	0.02	0.88	135.78
AM424498.1	0.02	0.88	135.78
AM462408.2	0.02	0.88	135.78
AM452522.2	0.02	0.88	135.78
AM451377.2	0.02	0.88	135.78
AM446081.1	0.02	0.88	135.78
AM432089.2	0.02	0.88	135.78
AM458366.2	0.02	0.88	135.78
AM461321.2	0.02	0.88	135.78
AM471698.2	0.02	0.88	135.78
AM438922.2	0.02	0.88	135.78
AM487702.2	0.02	0.88	135.78
AM461020.1	0.02	0.88	135.78
AM486252.2	0.02	0.88	135.78
AM426565.2	0.02	0.88	135.78
AM430870.1	0.02	0.88	135.78
AM477987.2	0.02	0.88	135.78
AM484107.2	0.02	0.88	135.78
AM430033.1	0.02	0.88	135.78
AM482958.2	0.02	0.88	135.78
AM432623.2	0.02	0.88	135.78
AM442747.2	0.02	0.88	135.78
AM434914.2	0.02	0.88	135.78
AM488634.1	0.02	0.88	135.78
AM473379.2	0.02	0.88	135.78
AM443758.1	0.02	0.88	135.78
AM478011.2	0.02	0.88	135.78
AM447363.2	0.02	0.88	135.78
AM427056.1	0.02	0.88	135.78
AM488825.2	0.02	0.88	135.78
AM426623.2	0.02	0.88	135.78
AM429434.2	0.02	0.88	135.78
AM467171.1	0.02	0.88	135.78
AM425354.2	0.02	0.88	135.78
AM426014.2	0.02	0.88	135.78
AM432525.2	0.02	0.88	135.78
AM449827.2	0.02	0.88	135.78
AM485454.1	0.02	0.88	135.78
AM457963.2	0.02	0.88	135.78
AM487796.2	0.02	0.88	135.78
AM457882.2	0.02	0.88	135.78
AM466321.1	0.02	0.88	135.78
AM436970.2	0.02	0.88	135.78
AM473275.1	0.02	0.88	135.78
AM440405.1	0.02	0.88	135.78
AM435987.1	0.02	0.87	135.78
AM464604.2	0.02	0.87	135.78
AM433443.2	0.02	0.87	135.78
AM444446.1	0.02	0.87	135.78
AM475005.1	0.02	0.87	135.78
AM451201.1	0.02	0.87	135.78
AM473617.1	0.02	0.87	135.78
AM437312.2	0.02	0.87	135.78
AM465295.2	0.02	0.87	135.78
AM455256.2	0.02	0.87	135.78
AM453535.2	0.02	0.87	135.78
AM473046.2	0.02	0.87	135.78
AM434055.2	0.02	0.87	135.78
AM473013.2	0.02	0.87	135.78
AM427678.1	0.02	0.87	135.78
AM445938.1	0.02	0.87	135.78
AM452027.2	0.02	0.87	135.78
AM440716.1	0.02	0.86	135.78
AM453796.1	0.02	0.86	135.78
AM475685.2	0.02	0.86	135.78
AM450669.2	0.02	0.86	135.78
AM463332.1	0.02	0.86	135.78
AM460533.1	0.02	0.86	135.78
AM432700.1	0.02	0.86	135.78
AM446579.2	0.02	0.86	135.78
AM439082.2	0.02	0.86	135.78
AM440425.1	0.02	0.86	135.78
AM440334.2	0.02	0.86	135.78
AM439566.1	0.02	0.85	135.78
AM450427.2	0.02	0.85	135.78
AM463761.2	0.02	0.85	135.78
AM458177.1	0.02	0.85	135.78
AM458066.1	0.02	0.85	135.78
AM471365.2	0.02	0.85	135.78
AM429709.1	0.02	0.85	135.78
AM430903.2	0.02	0.85	135.78
AM445537.1	0.02	0.85	135.78
AM479605.1	0.02	0.85	135.78
AM474263.2	0.02	0.85	135.78
AM441360.2	0.02	0.85	135.78
AM439538.1	0.02	0.85	135.78
AM447235.1	0.02	0.85	135.78
AM459333.2	0.02	0.85	135.78
AM435450.2	0.02	0.85	135.78
AM430568.2	0.02	0.85	135.78
AM469756.2	0.02	0.85	135.78
AM429015.2	0.02	0.85	135.78
AM477024.2	0.02	0.85	135.78
AM455108.1	0.02	0.85	135.78
AM460861.1	0.02	0.85	135.78
AM461706.2	0.02	0.85	135.78
AM471815.2	0.02	0.85	135.78
AM423446.2	0.02	0.85	135.78
AM474214.1	0.02	0.85	135.78
AM479128.1	0.02	0.85	135.78
AM438252.1	0.02	0.85	135.78
AM455844.2	0.02	0.85	135.78
AM460108.2	0.02	0.85	135.78
AM462633.2	0.02	0.85	135.78
AM461227.2	0.02	0.85	135.78
AM481350.1	0.02	0.85	135.78
AM467919.2	0.02	0.85	135.78
AM469357.1	0.02	0.85	135.78
AM455209.2	0.02	0.85	135.78
AM449635.2	0.02	0.85	135.78
AM424011.2	0.02	0.85	135.78
AM477618.2	0.02	0.85	135.78
AM456622.2	0.02	0.85	135.78
AM477988.2	0.02	0.85	135.78
AM479219.2	0.02	0.84	135.78
AM479645.2	0.02	0.84	135.78
AM436423.2	0.02	0.84	135.78
AM462357.2	0.02	0.84	135.78
AM470409.1	0.02	0.84	135.78
AM441102.2	0.02	0.84	135.78
AM462158.2	0.02	0.84	135.78
AM467332.2	0.02	0.84	135.78
AM476370.1	0.02	0.84	135.78
AM450986.2	0.02	0.84	135.78
AM464022.2	0.02	0.84	135.78
AM459778.2	0.02	0.84	135.78
AM489222.2	0.02	0.84	135.78
AM477872.2	0.02	0.84	135.78
AM486399.2	0.02	0.84	135.78
AM460223.2	0.02	0.84	135.78
AM466255.1	0.02	0.84	135.78
AM470120.1	0.02	0.84	135.78
AM473314.2	0.02	0.84	135.78
AM470661.2	0.02	0.84	135.78
AM465611.2	0.02	0.84	135.78
AM478884.2	0.02	0.84	135.78
AM430458.2	0.02	0.84	135.78
AM480481.2	0.02	0.84	135.78
AM462312.2	0.02	0.84	135.78
AM438244.2	0.02	0.84	135.78
AM465612.1	0.02	0.84	135.78
AM485287.2	0.02	0.84	135.78
AM461259.2	0.02	0.84	135.78
AM440626.2	0.02	0.84	135.78
AM427603.2	0.02	0.84	135.78
AM468246.1	0.02	0.84	135.78
AM482156.2	0.02	0.84	135.78
AM429493.2	0.02	0.84	135.78
AM440352.2	0.02	0.84	135.78
AM458877.2	0.02	0.84	135.78
AM442907.2	0.02	0.84	135.78
AM445447.1	0.02	0.84	135.78
AM463915.2	0.02	0.84	135.78
AM449363.2	0.02	0.84	135.78
AM473368.1	0.02	0.84	135.78
AM488986.2	0.02	0.84	135.78
AM460399.2	0.02	0.84	135.78
AM447330.2	0.02	0.84	135.78
AM482397.2	0.02	0.84	135.78
AM477194.1	0.02	0.84	135.78
AM453594.1	0.02	0.84	135.78
AM463897.1	0.02	0.84	135.78
AM437731.2	0.02	0.84	135.78
AM480817.2	0.02	0.84	135.78
AM454595.1	0.02	0.84	135.78
AM461352.1	0.02	0.84	135.78
AM453822.1	0.02	0.84	135.78
AM489181.1	0.02	0.84	135.78
AM449328.2	0.02	0.84	135.78
AM425453.2	0.02	0.84	135.78
AM469086.2	0.02	0.84	135.78
AM431014.2	0.02	0.84	135.78
AM486434.2	0.02	0.84	135.78
AM467993.2	0.02	0.84	135.78
AM464032.2	0.02	0.84	135.78
AM483503.2	0.02	0.84	135.78
AM461151.1	0.02	0.84	135.78
AB015870.1	0.02	0.84	135.78
AM486242.2	0.02	0.84	135.78
AM426447.2	0.02	0.84	135.78
AM478283.2	0.02	0.84	135.78
AM446472.2	0.02	0.84	135.78
AM459868.2	0.02	0.84	135.78
AM460056.2	0.02	0.84	135.78
AM446908.2	0.02	0.84	135.78
AM461745.2	0.02	0.84	135.78
AM484445.2	0.02	0.84	135.78
AM446955.2	0.02	0.84	135.78
AM488698.2	0.02	0.84	135.78
AM424947.2	0.02	0.84	135.78
AM447357.2	0.02	0.84	135.78
AM449296.1	0.02	0.84	135.78
AM435327.2	0.02	0.84	135.78
AM429817.2	0.02	0.84	135.78
AM476911.2	0.02	0.84	135.78
AM466337.2	0.02	0.84	135.78
AM471620.1	0.02	0.84	135.78
AM430164.2	0.02	0.84	135.78
AM439110.2	0.02	0.84	135.78
AM424709.1	0.02	0.84	135.78
AM475687.2	0.02	0.84	135.78
AM458711.2	0.02	0.84	135.78
AM470895.2	0.02	0.84	135.78
AM464556.2	0.02	0.84	135.78
AM443738.1	0.02	0.84	135.78
AM441431.1	0.02	0.83	135.78
AM434307.1	0.02	0.83	135.78
AM460819.2	0.02	0.83	135.78
AM425288.2	0.02	0.83	135.78
AM447616.2	0.02	0.83	135.78
AM457474.2	0.02	0.83	135.78
AM459406.2	0.02	0.83	135.78
AM446142.2	0.02	0.83	135.78
AM444445.2	0.02	0.83	135.78
AM466630.2	0.02	0.83	135.78
AM460685.1	0.02	0.83	135.78
AM452979.2	0.02	0.83	135.78
AM481638.2	0.02	0.83	135.78
AM440285.2	0.02	0.83	135.78
AM461935.2	0.02	0.83	135.78
AM467823.2	0.02	0.83	135.78
AM423820.1	0.02	0.83	135.78
AM446302.1	0.02	0.83	135.78
AM477621.2	0.02	0.83	135.78
AM476420.2	0.02	0.83	135.78
AM457082.2	0.02	0.83	135.78
AM469331.1	0.02	0.83	135.78
AM471378.1	0.02	0.83	135.78
AM483457.1	0.02	0.83	135.78
AM443314.2	0.02	0.83	135.78
AM487930.2	0.02	0.83	135.78
AM454217.2	0.02	0.83	135.78
AM432923.2	0.02	0.83	135.78
AM443436.2	0.02	0.83	135.78
AM485291.2	0.02	0.83	135.78
AM440160.2	0.02	0.83	135.78
AM447818.2	0.02	0.82	135.78
AM453734.2	0.02	0.82	135.78
AM484172.1	0.02	0.82	135.78
AM476577.2	0.02	0.82	135.78
AM442318.2	0.02	0.82	135.78
AM428058.2	0.02	0.82	135.78
AM446145.1	0.02	0.82	135.78
AM450525.2	0.02	0.82	135.78
AM473427.2	0.02	0.82	135.78
AM440706.2	0.02	0.82	135.78
AM445096.2	0.02	0.82	135.78
AM482832.1	0.02	0.82	135.78
AM482079.2	0.02	0.82	135.78
AM479692.2	0.02	0.82	135.78
AM467174.1	0.02	0.82	135.78
AM458915.2	0.02	0.82	135.78
AM446126.2	0.02	0.82	135.78
AM438931.2	0.02	0.82	135.78
AM475102.2	0.02	0.82	135.78
AM478634.1	0.02	0.82	135.78
AM423683.1	0.02	0.82	135.78
AM449652.2	0.02	0.82	135.78
AM466753.2	0.02	0.82	135.78
AM431511.1	0.02	0.82	135.78
AM454421.1	0.02	0.82	135.78
AM438306.2	0.02	0.82	135.78
AM477168.1	0.02	0.82	135.78
AM441484.2	0.02	0.82	135.78
AM460974.1	0.02	0.82	135.78
AM457557.2	0.02	0.82	135.78
AM438993.1	0.02	0.82	135.78
AM466151.2	0.02	0.82	135.78
AM483367.2	0.02	0.82	135.78
AM442045.1	0.02	0.82	135.78
AM441184.1	0.02	0.82	135.78
AM452914.2	0.02	0.82	135.78
AM468534.2	0.02	0.82	135.78
AM482538.1	0.02	0.82	135.78
AM443024.2	0.02	0.82	135.78
AM455523.2	0.02	0.82	135.78
AM433115.2	0.02	0.82	135.78
AM442184.2	0.02	0.82	135.78
AM486028.2	0.02	0.82	135.78
AM489063.1	0.02	0.82	135.78
AM431245.2	0.02	0.82	135.78
AM476535.2	0.02	0.82	135.78
AM489033.1	0.02	0.81	135.78
AM486448.2	0.02	0.81	135.78
AM435328.2	0.02	0.81	135.78
AM454331.1	0.02	0.81	135.78
AM457323.2	0.02	0.81	135.78
AM435701.2	0.02	0.81	135.78
AM440802.1	0.02	0.81	135.78
AM485976.2	0.02	0.81	135.78
AM428499.1	0.02	0.81	135.78
AM424917.2	0.02	0.81	135.78
AM467209.2	0.02	0.81	135.78
AM483868.1	0.02	0.81	135.78
AM446887.1	0.02	0.81	135.78
AM483681.1	0.02	0.81	135.78
AM478219.2	0.02	0.81	135.78
AM441858.2	0.02	0.81	135.78
AM475388.1	0.02	0.81	135.78
AM426321.2	0.02	0.81	135.78
AM434449.1	0.02	0.81	135.78
AM485221.2	0.02	0.81	135.78
AM444664.2	0.02	0.81	135.78
AM462687.1	0.02	0.81	135.78
AM485602.2	0.02	0.81	135.78
AM473036.2	0.02	0.8	135.78
AM434998.2	0.02	0.8	135.78
AM468794.2	0.02	0.8	135.78
AM469974.2	0.02	0.8	135.78
AM430534.1	0.02	0.8	135.78
AM427572.2	0.02	0.8	135.78
AM485301.2	0.02	0.8	135.78
AM424659.2	0.02	0.8	135.78
AM462836.2	0.02	0.8	135.78
AM463779.1	0.02	0.8	135.78
AM431380.2	0.02	0.8	135.78
AM429748.2	0.02	0.8	135.78
AM489030.2	0.02	0.8	135.78
AM474475.1	0.02	0.8	135.78
AM440559.2	0.02	0.8	135.78
AM466362.2	0.02	0.8	135.78
AM442421.2	0.02	0.8	135.78
AM465325.2	0.02	0.8	135.78
AM454325.2	0.02	0.8	135.78
AM423436.2	0.02	0.8	135.78
AM461623.2	0.02	0.8	135.78
AM452286.2	0.02	0.8	135.78
AM461162.2	0.02	0.8	135.78
AM478406.1	0.02	0.8	135.78
AM488777.2	0.02	0.8	135.78
AM425008.2	0.02	0.8	135.78
AM461436.2	0.02	0.8	135.78
AM468530.2	0.02	0.8	135.78
AM459786.2	0.02	0.8	135.78
AM451441.2	0.02	0.8	135.78
AM431669.2	0.02	0.8	135.78
AM474321.2	0.02	0.8	135.78
AM469859.2	0.02	0.8	135.78
AM429802.2	0.02	0.8	135.78
AM438177.2	0.02	0.8	135.78
AM481046.2	0.02	0.8	135.78
AM428417.1	0.02	0.8	135.78
AM482964.1	0.02	0.8	135.78
AM466516.2	0.02	0.8	135.78
AM481171.2	0.02	0.8	135.78
AM480406.1	0.02	0.8	135.78
AM441516.2	0.02	0.8	135.78
AM484888.2	0.02	0.8	135.78
AM481674.2	0.02	0.8	135.78
AM450930.1	0.02	0.8	135.78
AM456973.2	0.02	0.8	135.78
AM439137.2	0.02	0.8	135.78
AM488253.2	0.02	0.8	135.78
AM467695.2	0.02	0.8	135.78
AM441066.2	0.02	0.79	135.78
AM433831.2	0.02	0.79	135.78
AM454358.2	0.02	0.79	135.78
AM488746.2	0.02	0.79	135.78
AM454903.2	0.02	0.79	135.78
AM474816.1	0.02	0.79	135.78
AM488013.2	0.02	0.79	135.78
AM442914.2	0.02	0.79	135.78
AM488074.1	0.02	0.79	135.78
AM480226.2	0.02	0.79	135.78
AM436944.1	0.02	0.79	135.78
AM449175.2	0.02	0.79	135.78
AM469355.1	0.02	0.79	135.78
AM460194.2	0.02	0.79	135.78
AM484476.2	0.02	0.79	135.78
AM435495.2	0.02	0.79	135.78
AM459027.2	0.02	0.79	135.78
AM448745.2	0.02	0.79	135.78
AM467289.1	0.02	0.79	135.78
AM438876.1	0.02	0.79	135.78
AM447285.2	0.02	0.79	135.78
AM480414.2	0.02	0.79	135.78
AM476611.1	0.02	0.79	135.78
AM434780.2	0.02	0.79	135.78
AM463322.1	0.02	0.79	135.78
AM485040.2	0.02	0.79	135.78
AM481731.2	0.02	0.79	135.78
AM424398.1	0.02	0.79	135.78
AM466690.2	0.02	0.78	135.78
AM428324.2	0.02	0.78	135.78
AM463333.2	0.02	0.78	135.78
AM434838.2	0.02	0.78	135.78
AM483925.1	0.02	0.78	135.78
AM449250.2	0.02	0.78	135.78
AM437070.2	0.02	0.78	135.78
AM439323.1	0.02	0.78	135.78
AM476284.2	0.02	0.78	135.78
AM464283.2	0.02	0.78	135.78
AM430327.2	0.02	0.78	135.78
AM438874.1	0.02	0.78	135.78
AM481601.1	0.02	0.78	135.78
AM458085.2	0.02	0.78	135.78
AM450940.2	0.02	0.78	135.78
AM471581.2	0.02	0.78	135.78
AM465887.1	0.02	0.78	135.78
AM485148.2	0.02	0.78	135.78
AM477933.2	0.02	0.78	135.78
AM428133.1	0.02	0.78	135.78
AM465119.2	0.02	0.78	135.78
AM440050.2	0.02	0.77	135.78
AM445162.2	0.02	0.77	135.78
AM466941.2	0.02	0.77	135.78
AM453019.2	0.02	0.77	135.78
AM438594.2	0.02	0.77	135.78
AM453568.2	0.02	0.77	135.78
AM466849.2	0.02	0.77	135.78
AM430297.2	0.02	0.77	135.78
AM487984.1	0.02	0.77	135.78
AM434019.1	0.02	0.77	135.78
AM473308.1	0.02	0.77	135.78
AM454754.2	0.02	0.77	135.78
AM467859.2	0.02	0.77	135.78
AM429418.1	0.02	0.77	135.78
AM434615.2	0.02	0.77	135.78
AM446791.2	0.02	0.77	135.78
AM425948.2	0.02	0.77	135.78
AM483454.1	0.02	0.77	135.78
AM485440.2	0.02	0.77	135.78
AM434196.2	0.02	0.77	135.78
AM457292.2	0.02	0.77	135.78
AM486094.2	0.02	0.77	135.78
AM448140.2	0.02	0.77	135.78
AM479513.1	0.02	0.77	135.78
AM451771.1	0.02	0.76	135.78
AM452937.2	0.02	0.76	135.78
AM476790.2	0.02	0.76	135.78
AM476064.1	0.02	0.76	135.78
AM427251.2	0.02	0.76	135.78
AM481972.2	0.02	0.76	135.78
AM484663.2	0.02	0.76	135.78
AM467939.1	0.02	0.76	135.78
AM449655.1	0.02	0.76	135.78
AM473595.2	0.02	0.76	135.78
AM488752.1	0.02	0.76	135.78
AM461958.1	0.02	0.76	135.78
AM477505.2	0.02	0.76	135.78
AM440721.2	0.02	0.76	135.78
AM485926.2	0.02	0.76	135.78
AM472307.1	0.02	0.76	135.78
AM484241.2	0.02	0.76	135.78
AM484199.2	0.02	0.75	135.78
AM456163.1	0.02	0.75	135.78
AM437324.2	0.02	0.75	135.78
AM443348.1	0.02	0.75	135.78
AM459487.1	0.02	0.75	135.78
AM472310.1	0.02	0.75	135.78
AM463701.1	0.02	0.75	135.78
AM435700.1	0.02	0.75	135.78
AM471105.2	0.02	0.75	135.78
AM464367.1	0.02	0.75	135.78
AM454144.2	0.02	0.75	135.78
AM434294.1	0.02	0.75	135.78
AM450681.2	0.02	0.75	135.78
AM488721.2	0.02	0.75	135.78
AM450741.2	0.02	0.75	135.78
AM434801.2	0.02	0.75	135.78
AM450650.1	0.02	0.75	135.78
AM443418.1	0.02	0.75	135.78
AM423252.2	0.02	0.75	135.78
AM487035.1	0.02	0.74	135.78
AM453655.2	0.02	0.74	135.78
AM485170.2	0.02	0.74	135.78
AM469918.2	0.02	0.74	135.78
AM473803.2	0.02	0.74	135.78
AM481931.2	0.02	0.74	135.78
AM457711.2	0.02	0.74	135.78
AM467062.2	0.02	0.74	135.78
AM475395.2	0.02	0.74	135.78
AM472857.2	0.02	0.74	135.78
AM449470.2	0.02	0.74	135.78
AM460118.2	0.02	0.74	135.78
AM445651.1	0.02	0.74	135.78
AM438365.2	0.02	0.74	135.78
AM469815.2	0.02	0.74	135.78
AM478491.2	0.02	0.74	135.78
AM462382.2	0.02	0.73	135.78
AM468363.2	0.02	0.73	135.78
AM456077.1	0.02	0.73	135.78
AM424850.1	0.02	0.73	135.78
AM449937.2	0.02	0.73	135.78
AM468772.2	0.02	0.73	135.78
AM485646.2	0.02	0.73	135.78
AM477212.1	0.02	0.73	135.78
AM454997.2	0.02	0.73	135.78
AM431130.2	0.02	0.73	135.78
AM479608.2	0.02	0.73	135.78
AM476141.2	0.02	0.73	135.78
AM463380.2	0.02	0.72	135.78
AM455339.1	0.02	0.72	135.78
AM485470.1	0.02	0.72	135.78
AM454024.2	0.02	0.72	135.78
AM460245.1	0.02	0.72	135.78
AM437655.2	0.02	0.72	135.78
AM459347.2	0.02	0.72	135.78
AM466081.2	0.02	0.72	135.78
AM488027.1	0.02	0.71	135.78
AM428569.2	0.02	0.71	135.78
AM447385.2	0.02	0.71	135.78
AM452397.1	0.02	0.71	135.78
AM430003.2	0.02	0.71	135.78
AM440317.2	0.02	0.71	135.78
AM471452.2	0.02	0.71	135.78
AM462962.2	0.02	0.71	135.78
AM483162.2	0.02	0.71	135.78
AM457078.1	0.02	0.71	135.78
AM450679.2	0.02	0.71	135.78
AM460915.1	0.02	0.71	135.78
AM485409.2	0.02	0.71	135.78
AM451387.2	0.02	0.71	135.78
AM449192.2	0.02	0.71	135.78
AM486428.2	0.02	0.71	135.78
AM487261.1	0.02	0.7	135.78
AM443665.1	0.02	0.7	135.78
AM425414.2	0.02	0.7	135.78
AM425165.2	0.02	0.7	135.78
AM449544.1	0.02	0.7	135.78
AM477438.2	0.02	0.7	135.78
AM474663.2	0.02	0.7	135.78
AM440201.2	0.02	0.7	135.78
AM450287.1	0.02	0.7	135.78
AM446788.2	0.02	0.7	135.78
AM452760.1	0.02	0.7	135.78
AM475190.1	0.02	0.7	135.78
AM487862.2	0.02	0.7	135.78
AM479632.2	0.02	0.7	135.78
AM433164.2	0.02	0.7	135.78
AM473592.2	0.02	0.69	135.78
AM469877.2	0.02	0.69	135.78
AM489170.2	0.02	0.69	135.78
AM433271.2	0.02	0.69	135.78
AM476944.2	0.02	0.69	135.78
AM466208.2	0.02	0.69	135.78
AM488517.1	0.02	0.69	135.78
AM424720.1	0.02	0.69	135.78
AM427552.2	0.02	0.69	135.78
AM432018.1	0.02	0.68	135.78
AM466574.2	0.02	0.68	135.78
AM433784.2	0.02	0.68	135.78
AM450733.2	0.02	0.68	135.78
AM423449.2	0.02	0.68	135.78
AM451749.2	0.02	0.68	135.78
AM453829.2	0.02	0.67	135.78
AM431989.1	0.02	0.67	135.78
AM446427.2	0.02	0.67	135.78
AM426421.1	0.02	0.67	135.78
AM480337.2	0.02	0.67	135.78
AM436001.2	0.02	0.67	135.78
AM449159.1	0.02	0.67	135.78
AM439390.2	0.02	0.66	135.78
AM430949.2	0.02	0.66	135.78

## Sheet: Pifvine-3
accession	query coverage	bp				>90% TPase+ORF1 (>80% similar)				shotgun	ESTs hitting ORF1
AM461685.2	1	6368		good ORF1	good TPase	accession	querry coverage	max identity		AM465865	>gb|EC934484.1|	WIN051.C21_G16 Cab Sauv flower, leaf and root normalized (WIN05) Vitis vinifera cDNA clone WIN051_G16 3', mRNA sequence.
AM487852.1	0.76	4839.68		1	1	AM428950	1	0.98		AM465865	>gb|DY474564.1|	CSECS212E02_5_PREn0028 CabSau Normalised Berry Fruit Set Stage 28 (PREn0028) Vitis vinifera cDNA clone CSECS212E02 5', mRNA
AM462570.2	0.61	3884.48			1	AM431962	1	0.95		AM465865	>gb|BQ798892.1|	EST 1061 Green Grape berries Lambda Zap II Library Vitis vinifera cDNA clone GT161A08 3', mRNA sequence.	Shiraz	fruit
AM442821.2	0.61	3884.48				AM440662	1	0.93
AM428950.2	0.56	3566.08				AM442398	1	0.93			ESTs hittng the TPase:
AM466269.1	0.56	3566.08				AM442821	1	0.94		AM472440	>gb|DT029391.1|	UniGene info VVL034A03_680408 CabSau Berry Postveraison Mixed Stages 36-38 (Brix > 15) under water deficit stress Vitis vinifera cDNA
AM470249.2	0.56	3566.08		1	1 stop	AM447066	1	0.97		AM472440	>gb|DT027496.1|	UniGene info VVL012B04_676618 CabSau Berry Postveraison Mixed Stages 36-38 (Brix > 15) under water deficit stress Vitis vinifera cDNA
AM484436.2	0.56	3566.08				AM447180	1	0.94		AM472440	>gb|CF403174.1|	UniGene info CSECS001G07_PREu0032 CabSau Berry Preveraison Stage 32 (PREu0032) Vitis vinifera cDNA clone CSECS001G07 3', mRNA sequence.
AM427204.2	0.54	3438.72		1 stop	1 stop	AM458229	1	0.98		AM472440	>gb|DV223761.1|	UniGene info VVL152H04_700870 CabSau Berry Postveraison Mixed Stages 36-38 (Brix > 15) under water deficit stress Vitis vinifera cDNA
AM477492.1	0.5	3184		1	1	AM461685	1	0.98		AM472440	>gb|CB974629.1|	UniGene info CAB30005_IIa_Ra_F02 Cabernet Sauvignon Berry Stage I - CAB3 Vitis vinifera cDNA clone CAB30005_IIa_Ra_F02 3', mRNA sequence.
AM431962.1	0.5	3184				AM462570	1	0.96		AM429503	>gb|DT032392.1|	VVL068H03_686410 CabSau Berry Postveraison Mixed Stages 36-38 (Brix > 15) under water deficit stress Vitis vinifera cDNA
AM458229.1	0.49	3120.32		1	1 stop	AM465865	1	0.95		AM429503	>gb|DT030280.1|	VVL044D11_682186 CabSau Berry Postveraison Mixed Stages 36-38 (Brix > 15) under water deficit stress Vitis vinifera cDNA
AM477248.2	0.49	3120.32		1	1	AM466269	1	0.98
AM447066.2	0.48	3056.64		1 stop	1 stop	AM470249	1	0.98
AM465865.1	0.48	3056.64				AM477248	1	0.95
AM442398.1	0.48	3056.64		1	1 stop	AM477492	1	0.97
AM435987.1	0.48	3056.64		1 stop	1 stop	AM484436	1	0.97
AM440662.2	0.48	3056.64		1 stop	1	AM487852	1	0.97
AM446039.1	0.48	3056.64				AM428754	0.99	0.92
AM442883.2	0.48	3056.64				AM435987	0.99	0.94
AM431260.2	0.47	2992.96				AM442883	0.99	0.9
AM466197.2	0.47	2992.96			1 stop	AM446039	0.99	0.92
AM424117.2	0.47	2992.96				AM481345	0.99	0.96
AM428754.2	0.47	2992.96				AM459181	0.98	0.86
AM481345.2	0.46	2929.28		1 stop		AM424117	0.97	0.96
AM459993.2	0.45	2865.6				AM427940	0.97	0.95
AM427940.2	0.45	2865.6				AM431260	0.97	0.93
AM426970.2	0.44	2801.92				AM466197	0.97	0.97
AM424483.2	0.44	2801.92		1	1	AM427204	0.96	0.98
AM458301.2	0.44	2801.92				AM459263	0.95	0.89
AM447180.2	0.43	2738.24				AM423798	0.93	0.95
AM423798.2	0.43	2738.24				AM424483	0.92	0.94
AM423317.1	0.42	2674.56				AM459993	0.92	0.97
AM473606.2	0.42	2674.56				AM461657	0.92	0.83
AM459181.1	0.42	2674.56
AM459263.2	0.39	2483.52
AM450890.2	0.38	2419.84
AM461657.2	0.37	2356.16
AM474543.1	0.36	2292.48
AM441516.2	0.32	2037.76
AM471138.2	0.3	1910.4
AM488304.2	0.3	1910.4
AM436843.2	0.29	1846.72
AM462322.2	0.29	1846.72
AM469681.2	0.28	1783.04
AM487833.2	0.28	1783.04
AM444525.1	0.27	1719.36
AM425264.1	0.26	1655.68
AM486242.2	0.26	1655.68
AM438827.1	0.26	1655.68
AM426576.1	0.26	1655.68
AM473155.2	0.24	1528.32
AM433702.2	0.23	1464.64
AM472437.2	0.22	1400.96
AM468621.2	0.21	1337.28
AM480476.2	0.21	1337.28
AM444863.2	0.21	1337.28
AM440597.2	0.21	1337.28
AM466013.2	0.21	1337.28
AM429503.2	0.21	1337.28
AM463488.2	0.21	1337.28

## Sheet: Pifvine-4
accession	query coverage	bp				>90% TPase+ORF1 (>80% similar)				shotgun	ESTs hitting ORF1:
AM461257.2	1	5348		good ORF1	good TPase	accession	querry coverage	max identity		AM479280	>gb|DT033738.1|	VVL085B04_689102 CabSau Berry Postveraison Mixed Stages 36-38 (Brix > 15) under water deficit stress Vitis vinifera cDNA clone VVL085B04 5, mRNA sequence.
AM482229.2	1	5348		1	1	AM482229	1	0.99		AM479280	>gb|DT030622.1|	VVL048D10_682870 CabSau Berry Postveraison Mixed Stages 36-38 (Brix > 15) under water deficit stress Vitis vinifera cDNA clone VVL048D10 5, mRNA sequence.
AM444930.2	0.93	4973.64		1	1	AM461257	1	0.99		AM453829	>gb|DV224060.1|	UniGene info VVL156C03_701468 CabSau Berry Postveraison Mixed Stages 36-38 (Brix > 15) under water deficit stress Vitis vinifera cDNA clone VVL156C03 5, mRNA sequence.
AM454012.1	0.82	4385.36		1	1	AM444930	1	0.98		AM453829	>gb|DT036992.1|	UniGene info VVL122E02_695610 CabSau Berry Postveraison Mixed Stages 36-38 (Brix > 15) under water deficit stress Vitis vinifera cDNA clone VVL122E02 5, mRNA sequence.
AM488816.2	0.81	4331.88		1 stop	2 stop	AM449212	1	0.98		AM453829	>gb|DT035723.1|	UniGene info VVL108B04_693072 CabSau Berry Postveraison Mixed Stages 36-38 (Brix > 15) under water deficit stress Vitis vinifera cDNA clone VVL108B04 5, mRNA sequence.
AM475672.2	0.81	4331.88		1	1	AM460140	1	0.98		AM453829	>gb|DT034776.1|	UniGene info VVL097B11_691178 CabSau Berry Postveraison Mixed Stages 36-38 (Brix > 15) under water deficit stress Vitis vinifera cDNA clone VVL097B11 5, mRNA sequence.
AM464274.1	0.81	4331.88		1 stop	1	AM488816	1	0.98		AM453829	>gb|DT033543.1|	UniGene info VVL082H02_688712 CabSau Berry Postveraison Mixed Stages 36-38 (Brix > 15) under water deficit stress Vitis vinifera cDNA clone VVL082H02 5, mRNA sequence.
AM447904.1	0.81	4331.88		1 stop	1	AM444759	1	0.98
AM479280.2	0.79	4224.92		1		AM475672	1	0.98
AM449212.2	0.78	4171.44		1 stop	2 stop	AM454012	1	0.97			ESTs hitting TPase:
AM460140.1	0.76	4064.48		1	1	AM475932	0.98	0.97		AM479280	>gb|CD009673.1|	VVB094G11_340865 An expressed sequence tag database for abiotic stressed leaves of Vitis vinifera var. Chardonnay Vitis vinifera
AM444759.2	0.75	4011		1 stop	2 stop	AM469988	1	0.96		AM479280	>gb|CD721177.1|	VVB180E09_414261 An expressed sequence tag database for abiotic stressed leaves of Vitis vinifera var. Chardonnay Vitis vinifera
AM453829.2	0.73	3904.04				AM479280	1	0.96		AM479280	>gb|CD007242.1|	VVB075D08_333612 An expressed sequence tag database for abiotic stressed leaves of Vitis vinifera var. Chardonnay Vitis vinifera
AM472457.2	0.71	3797.08				AM447904	1	0.96
AM473516.1	0.67	3583.16				AM441200	0.98	0.96
AM442172.2	0.66	3529.68		1	1 stop	AM464274	1	0.95
AM444097.2	0.66	3529.68		1 stop	1	AM453829	1	0.93
AM446666.1	0.65	3476.2				AM471414	0.95	0.93
AM469988.2	0.6	3208.8			1	AM435791	0.93	0.93
AM434095.2	0.59	3155.32				AM434095	1	0.92
AM430898.2	0.58	3101.84				AM446666	1	0.92
AM439949.1	0.58	3101.84				AM430898	0.99	0.92
AM430293.2	0.58	3101.84				AM425680	0.95	0.92
AM428291.1	0.58	3101.84				AM444097	1	0.9
AM488112.1	0.57	3048.36				AM442172	1	0.89
AM434055.2	0.57	3048.36				AM473516	1	0.88
AM471414.2	0.57	3048.36				AM488112	1	0.88
AM470810.2	0.56	2994.88				AM472457	0.96	0.88
AM450771.2	0.53	2834.44				AM434055	1	0.87
AM476336.2	0.53	2834.44				AM466037	1	0.86
AM466037.2	0.52	2780.96				AM439949	0.97	0.86
AM453761.2	0.52	2780.96				AM486567	0.99	0.85
AM476569.1	0.51	2727.48				AM476569	1	0.83
AM486567.2	0.51	2727.48				AM453482	0.96	0.81
AM429673.2	0.51	2727.48
AM475932.2	0.5	2674
AM425680.2	0.49	2620.52
AM478605.2	0.49	2620.52
AM435791.2	0.48	2567.04
AM441200.2	0.47	2513.56
AM453482.2	0.47	2513.56
AM446915.2	0.47	2513.56
AM433444.1	0.46	2460.08
AM457591.2	0.46	2460.08
AM462232.2	0.46	2460.08
AM442706.2	0.45	2406.6
AM457186.2	0.44	2353.12
AM475670.2	0.43	2299.64
AM456266.1	0.43	2299.64
AM448343.1	0.42	2246.16
AM480128.2	0.41	2192.68
AM461301.2	0.41	2192.68
AM458144.2	0.4	2139.2
AM441232.2	0.4	2139.2
AM444174.2	0.39	2085.72
AM461723.1	0.39	2085.72
AM485414.1	0.39	2085.72
AM489331.2	0.38	2032.24
AM430613.2	0.37	1978.76
AM430749.2	0.37	1978.76
AM479586.2	0.35	1871.8
AM483093.2	0.34	1818.32
AM482681.2	0.33	1764.84
AM431879.2	0.33	1764.84
AM477270.1	0.33	1764.84
AM480907.1	0.32	1711.36
AM446370.2	0.31	1657.88
AM430084.2	0.28	1497.44
AM483138.1	0.28	1497.44
AM483457.1	0.28	1497.44
AM483444.2	0.28	1497.44
AM468314.2	0.27	1443.96
AM487625.2	0.27	1443.96
AM481565.1	0.27	1443.96
AM460891.2	0.27	1443.96
AM452105.2	0.26	1390.48
AM439512.2	0.26	1390.48
AM439390.2	0.26	1390.48
AM430138.2	0.25	1337
AM464110.1	0.24	1283.52
AM470623.2	0.24	1283.52
AM480139.2	0.23	1230.04
AM440294.2	0.23	1230.04
AM458157.2	0.22	1176.56
AM462668.2	0.22	1176.56
AM487070.2	0.21	1123.08
AM458447.1	0.21	1123.08
